# Supplementary material for: School-level administrative data is associated with childhood and young adult mental health: Evidence from a UK longitudinal cohort
Source: Research Square preprint supplement (doi:10.21203/rs.3.rs-8681038/v1), 2026-02-09
Supplement: Supplementary file 1 [file adadea58984af7cea33ca70e.docx]

# Supplementary note

**School-level administrative data is associated with childhood and young adult mental health: Evidence from a UK longitudinal cohort**

**Rebecca Ferdinand, Anna Suarez, Agnieszka Musial, Kathleen Rastle, Andrew McMillan, Margherita Malanchini, Dawn Watling, and Kaili Rimfeld**

### Supplementary Note: Data linkage

We linked mental health data collected on participants in TEDS (Twins Early Development Study) to school environment data from two sources: the National Pupil Database and Ofsted.

For merging with the National Pupil Database, a list of consenting participants was provided to the Department for Education, which assigned each participant an anonymous matching reference ID and matched them to their corresponding individual absence data and local authority establishment number (LAESTAB), which is unique to each school. Ofsted data from 2005 to 2015 is publicly available. During this period, school inspections took place every 3-6 years. Participants were matched to the closest inspection available to the academic years in which they were 12 and 16, using the LAESTAB as the identifying variable.

The TEDS dataset was split into 4 school cohort sets based on the twins’ birth dates: cohort 1 (born between January 1994 and August 1994); cohort 2 (born between September 1994 and August 1995); cohort 3 (born between September 1995 and August 1996), and cohort 4 (born between September 1996 and December 1996).

Participants from cohort 1 (N=2,958) were tested at age 12 in academic year 2005-06 and at age 16 in academic year 2009-10. Based on their anonymous matching reference ID and LAESTAB, this cohort was merged with relevant individual- level absence, school-level, and Ofsted data for those academic years.

Participants from cohort 2 (N=4,561) were tested at age 12 in academic year 2006-07 and at age 16 in academic year 2010-11. Based on their anonymous matching reference ID and LAESTAB, this cohort was merged with relevant individual-level absence, school-level, and Ofsted data for those academic years.

Participants from cohort 3 (N=4,272) were tested at age 11-12 also in academic year 2006-07 and at age 16 in academic year 2011-12. Based on their anonymous matching reference ID and LAESTAB, this cohort was merged with relevant individual-level absence, school-level and Ofsted data for those academic years.

Participants from cohort 4 (N=1,495) were tested at ages 11-12 in academic year 2007-8 and at age 16 in academic year 2012-13. Based on their anonymous matching reference ID and LAESTAB, this cohort was merged with relevant individual-level absence, school-level data and Ofsted data for those academic years.
