# Supplementary material for: School-level administrative data is associated with childhood and young adult mental health: Evidence from a UK longitudinal cohort
Source: Research Square preprint supplement (doi:10.21203/rs.3.rs-8681038/v1), 2026-02-09
Supplement: Supplementary file 2 [file f373b0a3f01209f7a2282722.docx]

# Supplementary materials

**School-level administrative data is associated with childhood and young adult mental health: Evidence from a UK longitudinal cohort**

**Rebecca Ferdinand, Anna Suarez, Agnieszka Musial, Kathleen Rastle, Andrew McMillan, Margherita Malanchini, Dawn Watling, and Kaili Rimfeld**

Table of Contents

[Supplementary materials 1](#_Toc218601260)

[Supplementary Table 1: Descriptive statistics for mental health measures in the whole sample 4](#_Toc218601261)

[Supplementary Table 2: Descriptive statistics for school-level administrative environment measures in the whole sample 11](#_Toc218601262)

[Supplementary Table 3: Descriptive statistics for perceived school environment measures in the whole sample 14](#_Toc218601263)

[Supplementary Table 4: Descriptive statistics for mental health measures for males and females separately, with results of ANOVA testing for sex differences 16](#_Toc218601264)

[Supplementary Table 5: Descriptive statistics for school-level administrative measures for males and females separately, ANOVA testing for sex differences 26](#_Toc218601265)

[Supplementary Table 6: Descriptive statistics for perceived school environment measures for males and females separately, ANOVA testing for sex differences 30](#_Toc218601266)

[Supplementary Table 7: Factor loadings and model fit statistics for confirmatory factor analyses (CFA) for the general factor of psychopathology 34](#_Toc218601267)

[Supplementary Table 8: Variance in age 12 P-factor explained by all age 12 school-level administrative measures without factor analysis using linear regression models (robustness check) 41](#_Toc218601268)

[Supplementary Table 9: Variance in age 16 P-factor explained by all age 16 school-level administrative measures without factor analysis using linear regression models (robustness check) 42](#_Toc218601269)

[Supplementary Table 10: Variance in age 16 P-factor explained by all age 12 and16 school-level administrative measures without factor analysis using linear regression models (robustness check) 42](#_Toc218601270)

[Supplementary Table 11: Variance in age 12 P-factor explained by all age 12 and16 school-level administrative measures without factor analysis using linear regression models (robustness check) 43](#_Toc218601271)

[Supplementary Table 12: Penalised coefficients and summary statistics from contemporaneous penalised elastic net regressions at ages 12 and 16 (robustness checks) 43](#_Toc218601272)

[Supplementary Table 13: Penalised coefficients and summary statistics from penalised elastic net regressions over development at ages 16 and 21(robustness checks) 46](#_Toc218601273)

[Supplementary Table 14: Standardised estimates for cross-lagged analyses of the general factor of psychopathology at 12 and 16 and individual absences at 12 and 16, adjusted for 27 adult psychiatric polygenic scores 52](#_Toc218601274)

[Supplementary Table 15: Standardised estimates for cross-lagged analyses of the general factor of psychopathology at 12 and 16 and pupil community characteristics at 12 and 16, adjusted for 27 adult psychiatric polygenic scores 53](#_Toc218601275)

[Supplementary Table 16: Standardised estimates for cross-lagged analyses of the general factor of psychopathology at 12 and 16 and pupil community characteristics at 12 and 16, adjusted for 27 adult psychiatric polygenic scores and socioeconomic status 54](#_Toc218601276)

[Supplementary Table 17: Standardised estimates for cross-lagged analyses of the general factor of psychopathology at 12 and 16 and school-level characteristics at 12 and 16, adjusted for 27 adult psychiatric polygenic scores 54](#_Toc218601277)

[Supplementary Table 18: Standardised estimates for cross-lagged analyses of the general factor of psychopathology at 12 and 16 and school-level characteristics at 12 and 16, adjusted for 27 adult psychiatric polygenic scores and socioeconomic status 55](#_Toc218601278)

[Supplementary Table 19: Standardised estimates for cross-lagged analyses of the general factor of psychopathology at 12 and 16 and school-level characteristics at 12 and 16, adjusted for 27 adult psychiatric polygenic scores, SES and general factor of psychopathology at age 7 56](#_Toc218601279)

[Supplementary Table 20: Model fit indices of four cross-lagged models for individual absence, pupil community characteristics, school-level characteristics and headcount at 12 and 16 with the general factor of psychopathology (P-factor) at 12 and 16 56](#_Toc218601280)

[Supplementary Table 21: Reduced (perceived school measures only) and full (perceived and administrative school measures) linear regression models across development (without factor analysis; robustness check) 57](#_Toc218601281)

[Supplementary Table 22: List of all mental health measures at each age 57](#_Toc218601282)

[Supplementary Table 23: Full list of school-level administrative measures 61](#_Toc218601283)

[Supplementary Table 24: Eigenvalues and standardised factor loadings greater than +/- 0.30 for exploratory factor analysis (EFA; using oblimin rotation) of school-level administrative measures at age 16 63](#_Toc218601284)

[Supplementary Table 25: Factor loadings and model fit statistics for confirmatory factor analyses (CFA) of school-level administrative measures at ages 12 and 16 65](#_Toc218601285)

[Supplementary Table 26: Full list of subjective school environment measures 69](#_Toc218601286)

[Supplementary Table 27: Eigenvalues and standardised factor loadings greater than +/- 0.30 for exploratory factor analysis (EFA; using oblimin rotation) of subjective school environment measures at age 9 and 16 72](#_Toc218601287)

[Supplementary Table 28: Factor loadings and model fit statistics for confirmatory factor analyses (CFA) of subjective school environment measures at ages 9 and 16 75](#_Toc218601288)

### Supplementary Table 1: Descriptive statistics for mental health measures in the whole sample

| Age 7 |  |  |  |  |  |  |
| --- | --- | --- | --- | --- | --- | --- |
|  | n | mean | sd | range | skew | kurtosis |
| SDQ prosocial total (parent-rated) | 5123 | 8.18 | 1.76 | 10 | -0.94 | 0.41 |
| SDQ hyperactivity total (parent-rated | 5122 | 3.44 | 2.52 | 10 | 0.63 | -0.32 |
| SDQ conduct total (parent-rated) | 5123 | 1.61 | 1.58 | 10 | 1.15 | 1.46 |
| SDQ peer problems total (parent-rated) | 5123 | 0.95 | 1.4 | 9 | 2.03 | 4.95 |
| SDQ emotion total (parent-rated) | 5123 | 2.16 | 1.85 | 10 | 1.05 | 1.03 |
| SDQ prosocial total (teacher-rated) | 4254 | 7.4 | 2.34 | 10 | -0.66 | -0.16 |
| SDQ hyperactivity total (teacher-rated) | 4256 | 2.69 | 2.55 | 10 | 1.14 | 0.58 |
| SDQ conduct total (teacher-rated) | 4252 | 0.65 | 1.27 | 10 | 2.79 | 9.86 |
| SDQ peer problem total (teacher-rated) | 4250 | 1.02 | 1.46 | 9 | 1.79 | 3.35 |
| SDQ emotion total (teacher-rated) | 4234 | 1.25 | 1.74 | 10 | 1.8 | 3.51 |
| Social (ASD) total (parent-rated) | 5123 | 3.14 | 2.33 | 19 | 1.27 | 2.72 |
| Non-Social (ASD) total (parent-rated) | 5123 | 3.61 | 2.12 | 12 | 0.6 | 0.11 |
| Social (ASD) total (teacher-rated) | 4251 | 3.01 | 2.62 | 17 | 1.43 | 2.35 |
| Non-Social (ASD) total (teacher) | 4250 | 2.74 | 1.8 | 12 | 0.89 | 1.25 |
|  |  |  |  |  |  |  |

| Age 9 | | | | | | |
| --- | --- | --- | --- | --- | --- | --- |
|  | n | mean | sd | range | skew | kurtosis |
| SDQ Prosocial scale (parent-rated) | 2495 | 8.27 | 1.71 | 10 | -1.06 | 0.94 |
| SDQ Hyperactivity scale (parent-rated) | 2492 | 3.11 | 2.32 | 10 | 0.9 | 0.4 |
| SDQ Conduct scale (parent-rated) | 2494 | 1.24 | 1.41 | 10 | 1.47 | 2.94 |
| SDQ Peer Problems scale (parent-rated) | 2494 | 1.02 | 1.5 | 9 | 2.05 | 4.98 |
| SDQ Emotion scale (parent-rated) | 2493 | 1.73 | 1.93 | 10 | 1.41 | 1.85 |
| SDQ Prosocial scale (child self-report) | 2486 | 7.88 | 1.84 | 9 | -0.57 | -0.47 |
| SDQ Hyperactivity scale (child self-report) | 2483 | 3.81 | 2.27 | 10 | 0.26 | -0.61 |
| SDQ Conduct scale (child self-report) | 2481 | 2.13 | 1.83 | 10 | 0.96 | 0.7 |
| SDQ Peer Problem scale (child self-report) | 2468 | 1.94 | 1.75 | 10 | 0.98 | 0.85 |
| SDQ Emotion scale (child self-report) | 2477 | 3.23 | 2.37 | 10 | 0.55 | -0.39 |
| SDQ Prosocial scale (teacher-report) | 2050 | 7.64 | 2.23 | 10 | -0.8 | -0.13 |
| SDQ Hyperactivity scale (teacher-report) | 2045 | 2.42 | 2.37 | 10 | 1.19 | 0.98 |
| SDQ Conduct scale (teacher-report) | 2047 | 0.47 | 1.1 | 9 | 3.31 | 13.26 |
| SDQ Peer Problem scale (teacher-report) | 2052 | 0.85 | 1.44 | 9 | 2.33 | 6.37 |
| SDQ Emotion scale (teacher-report) | 2052 | 1.33 | 1.79 | 10 | 1.61 | 2.56 |
| CAST Social scale at 9 (parent-rated) | 2494 | 2.39 | 1.83 | 11 | 0.79 | 0.66 |
| CAST Non-Social scale at 9 (parent-rated) | 2491 | 2.07 | 1.53 | 10 | 0.85 | 0.91 |
| CAST Communication scale at 9 (parent-rated) | 2493 | 2.28 | 1.99 | 12 | 1.12 | 1.45 |
| CAST Social scale at 9 (child self-report) | 2406 | 4.42 | 2.33 | 14 | 0.41 | 0.13 |
| CAST Non-Social scale at 9 (child self-report) | 2412 | 3.94 | 2.08 | 12 | 0.65 | 0.15 |
| CAST Communication scale at 9 (child self-report) | 2414 | 3.33 | 2.55 | 12 | 0.74 | 0.13 |
| CAST Social scale at 9 (teacher-rated) | 2050 | 2.54 | 2.14 | 13 | 1.3 | 2.45 |
| CAST Non-Social scale at 9 (teacher-rated) | 2050 | 1.66 | 1.51 | 10 | 1.35 | 2.64 |
| CAST Communication scale at 9 (teacher-rated) | 2053 | 2.18 | 2.23 | 14 | 1.47 | 2.77 |
| APSD Narcissism scale (parent-rated) | 2494 | 1.8 | 1.97 | 12 | 1.65 | 3.3 |
| APSD Impulsivity scale (parent-rated) | 2496 | 3.19 | 2.06 | 10 | 0.54 | -0.03 |
| APSD Narcissism scale (teacher-rated) | 2052 | 1.09 | 2 | 13 | 2.48 | 6.64 |
| APSD Impulsivity scale (teacher-rated) | 2052 | 1.49 | 1.86 | 10 | 1.51 | 2.09 |

| Age 12 |  |  |  |  |  |  |
| --- | --- | --- | --- | --- | --- | --- |
|  | n | mean | sd | range | skew | kurtosis |
| SDQ Emotion scale (parent-rated) | 4486 | 1.8 | 1.92 | 10 | 1.27 | 1.38 |
| SDQ Emotion scale (teacher-rated) | 3702 | 1.19 | 1.78 | 10 | 1.85 | 3.39 |
| SDQ Emotion scale (child self-report) | 4480 | 2.2 | 2.06 | 10 | 1.01 | 0.71 |
| SDQ behaviour problems scale (parent-rated) | 4487 | 6.86 | 5.05 | 34 | 1.16 | 1.67 |
| SDQ behaviour problems scale (teacher-rated) | 3708 | 4.68 | 4.77 | 32 | 1.66 | 3.54 |
| SDQ behaviour problems scale (child self-report) | 4481 | 8.8 | 5.34 | 33 | 0.79 | 0.66 |
| Mood and Feelings scale (parent) | 4486 | 1.15 | 2.33 | 22 | 3.46 | 16.1 |
| Mood and Feelings scale (parent) | 4497 | 2.27 | 3.26 | 22 | 2.16 | 5.52 |
| APSD (Anti-social personality disorder) overall scale (parent) | 4495 | 7.1 | 4.34 | 36 | 1.11 | 2.26 |
| APSD (Anti-social personality disorder) overall scale (teacher) | 3690 | 4.8 | 4.87 | 34 | 2.04 | 5.45 |
| CAST overall scale (parent) | 4627 | 4.74 | 3.39 | 26 | 1.51 | 3.74 |
| CAST overall scale (teacher) | 3669 | 4.74 | 3.6 | 26 | 1.76 | 4.23 |
| Conners ADHD overall scale (parent) | 4493 | 9.51 | 8.49 | 54 | 1.69 | 3.68 |
| SDQ Prosocial scale (parent) | 4497 | 8.58 | 1.63 | 10 | -1.27 | 1.53 |
| SDQ Prosocial scale (teacher) | 3676 | 8.07 | 2.03 | 10 | -0.99 | 0.4 |
| SDQ Prosocial scale (child) | 4483 | 7.5 | 1.87 | 10 | -0.43 | -0.48 |
| SDQ Hyperactivity scale (parent) | 4486 | 2.72 | 2.24 | 10 | 0.9 | 0.42 |
| SDQ Hyperactivity scale (teacher) | 3707 | 2.01 | 2.35 | 10 | 1.32 | 1.2 |
| SDQ Hyperactivity scale (child self-report) | 4481 | 3.43 | 2.29 | 10 | 0.49 | -0.35 |
| SDQ Conduct scale (parent) | 4487 | 1.26 | 1.43 | 10 | 1.49 | 3.21 |
| SDQ Conduct scale (teacher) | 3710 | 0.51 | 1.19 | 10 | 3.3 | 13.18 |
| SDQ Conduct scale (child self-report) | 4482 | 1.84 | 1.61 | 10 | 1.13 | 1.51 |
| SDQ Peer Problems scale (parent) | 4486 | 1.08 | 1.5 | 9 | 1.85 | 3.98 |
| SDQ Peer Problems scale (teacher) | 3703 | 0.99 | 1.54 | 10 | 2.11 | 5.07 |
| SDQ Peer Problems scale (child self-report) | 4482 | 1.33 | 1.58 | 10 | 1.68 | 3.33 |
| APSD Callous-Unemotional scale (parent) | 4495 | 3.01 | 1.9 | 12 | 0.44 | -0.09 |
| APSD Callous-Unemotional scale (teacher) | 3682 | 2.59 | 2.06 | 12 | 0.83 | 0.6 |
| APSD Narcissism scale (parent) | 4494 | 1.44 | 1.69 | 14 | 1.98 | 5.6 |
| APSD Narcissism scale (teacher) | 3692 | 0.88 | 1.84 | 13 | 2.92 | 9.77 |
| APSD Impulsivity scale (parent) | 4483 | 2.49 | 1.85 | 10 | 0.66 | 0.08 |
| APSD Impulsivity scale (teacher) | 3685 | 1.26 | 1.76 | 10 | 1.72 | 3.08 |
| CAST Social scale (parent) | 4626 | 1.57 | 1.48 | 11 | 1.51 | 3.58 |
| CAST Social scale (teacher) | 3655 | 2.61 | 1.89 | 11 | 1.11 | 1.73 |
| CAST Non-Social scale (parent) | 4621 | 1.37 | 1.27 | 7 | 0.9 | 0.74 |
| CAST Non-Social scale (teacher) | 3539 | 0.79 | 1.07 | 7 | 1.73 | 4.05 |
| CAST Communication scale (parent) | 4626 | 1.81 | 1.8 | 11 | 1.37 | 2.23 |
| CAST Communication scale (teacher) | 3678 | 1.36 | 1.77 | 12 | 1.89 | 4.29 |
| Conners Hyperactivitiy-Impulsivity scale (parent) | 4492 | 4.09 | 4.29 | 27 | 1.81 | 4.1 |
| Conners Inattention scale (parent) | 4493 | 5.43 | 5.12 | 27 | 1.48 | 2.45 |

| Age 16 |  |  |  |  |  |  |
| --- | --- | --- | --- | --- | --- | --- |
|  | n | mean | sd | range | skew | kurtosis |
| SDQ Hyperactivity scale (parent) | 4282 | 2.23 | 1.94 | 10 | 1.15 | 1.4 |
| SDQ Conduct scale (parent) | 4288 | 1.2 | 1.37 | 10 | 1.63 | 3.76 |
| SDQ Prosocial scale (parent) | 4285 | 8.27 | 1.93 | 10 | -1.16 | 0.91 |
| SDQ Emotion scale (child) | 4273 | 2.74 | 2.23 | 10 | 0.76 | 0.03 |
| SDQ Peer Problems scale (child) | 4273 | 1.53 | 1.48 | 10 | 1.34 | 2.36 |
| SDQ Hyperactivity scale (child) | 4273 | 3.57 | 2.33 | 10 | 0.49 | -0.3 |
| SDQ Conduct scale (child) | 4272 | 1.62 | 1.47 | 10 | 1.37 | 2.44 |
| SDQ Prosocial scale (child) | 4271 | 7.18 | 1.92 | 10 | -0.48 | -0.21 |
| MFQ total scale (child) | 4276 | 3.58 | 4.34 | 26 | 2 | 4.73 |
| MFQ total scale (parent) | 4287 | 0.98 | 2.3 | 22 | 4 | 20.11 |
| ARBQ Anxiety total scale (parent) | 4288 | 3.56 | 4.2 | 33.78 | 2.08 | 6.1 |
| Conners Impulsivity scale (parent) | 4283 | 2.52 | 3.41 | 24.75 | 2.43 | 7.66 |
| Conners Inattention scale (parent) | 4283 | 4.09 | 4.81 | 27 | 1.8 | 3.76 |
| Conners Emotional Lability scale (parent) | 4286 | 1.24 | 1.79 | 9 | 1.91 | 3.79 |
| ICUT Callous scale (child) | 964 | 5.28 | 3.5 | 22 | 1.42 | 2.54 |
| ICUT Callous scale (parent) | 4283 | 4.64 | 3.53 | 27 | 1.59 | 4.12 |
| ICUT Unemotional scale (child) | 963 | 7.66 | 3.13 | 15 | 0.12 | -0.14 |
| ICUT Unemotional scale (parent) | 4288 | 5.17 | 2.92 | 15 | 0.49 | 0.08 |
| ICUT Uncaring scale (child) | 963 | 6.43 | 3.66 | 24 | 0.78 | 0.89 |
| ICUT Uncaring scale (parent) | 4288 | 7.51 | 4.77 | 24 | 0.55 | -0.26 |
| Autism Quotient Social scale (child) | 4274 | 6.96 | 4.12 | 24 | 0.78 | 0.71 |
| Autism Quotient Social scale (parent) | 4288 | 7.27 | 4.69 | 27 | 0.82 | 0.61 |
| Autism Quotient Attention Switching scale (parent) | 4287 | 8.22 | 4.19 | 24 | 0.46 | 0.16 |
| Autism Quotient Imagination scale (parent) | 4267 | 4.28 | 3.3 | 18 | 0.74 | 0.5 |
| Autism Quotient Attention to Detail scale (child) | 4273 | 4.91 | 3.51 | 15 | 0.46 | -0.41 |
| Autism Quotient Attention to Detail scale (parent) | 4272 | 4.37 | 3.8 | 15 | 0.73 | -0.32 |
| Subjective Happiness Scale overall mean score (child ) | 4271 | 5.13 | 0.95 | 6 | -0.53 | 0.55 |
| CASI Anxiety total scale (child) | 4277 | 8.03 | 5.95 | 36 | 1.14 | 1.38 |
| SWAN Inattention mean score (child ) | 966 | 4.73 | 0.87 | 5.78 | -0.05 | 0.16 |

| SWAN Hyperactivity mean score (child ) | 965 | 4.85 | 1 | 5.67 | -0.02 | -0.46 |
| --- | --- | --- | --- | --- | --- | --- |

| Age 21 |  |  |  |  |  |  |
| --- | --- | --- | --- | --- | --- | --- |
|  | n | mean | sd | range | skew | kurtosis |
| SDQ Emotion total score (parent) | 4472 | 2.38 | 2.31 | 10 | 1.06 | 0.49 |
| SDQ Emotion total score (twin) | 4011 | 3.56 | 2.69 | 10 | 0.51 | -0.7 |
| SDQ Conduct total score (parent) | 4479 | 1.21 | 1.29 | 10 | 1.83 | 5.68 |
| SDQ Conduct total score (twin) | 4011 | 1.55 | 1.29 | 9 | 1.52 | 3.59 |
| SDQ Hyperactivity total score (parent) | 4473 | 1.9 | 1.99 | 10 | 1.36 | 1.82 |
| SDQ Hyperactivity total score (twin) | 4011 | 3.26 | 2.17 | 10 | 0.51 | -0.24 |
| SDQ Peer problems total score (parent) | 4475 | 1.39 | 1.74 | 10 | 1.54 | 2.34 |
| SDQ Peer problems total score (twin) | 4011 | 2.14 | 1.8 | 10 | 0.92 | 0.79 |
| SDQ Prosocial total score (parent) | 4481 | 8.16 | 1.96 | 10 | -1.22 | 1.2 |
| SDQ Prosocial total score (twin) | 4012 | 7.66 | 1.88 | 10 | -0.79 | 0.22 |
| MFQ overall total score (twin) | 4010 | 4.34 | 4.02 | 16 | 0.98 | 0.17 |
| MFQ overall total score (twin) | 3645 | 3.76 | 3.82 | 16 | 1.17 | 0.71 |
| Conners Impulsivity total score (parent) | 4474 | 2.48 | 3.68 | 27 | 2.37 | 6.81 |
| Conners Inattention total score (parent) | 4476 | 3.88 | 4.51 | 27 | 1.93 | 4.56 |
| General Anxiety overall total score (twin) | 3644 | 7.24 | 7.39 | 40 | 1.59 | 2.49 |
| BAQ Physical Aggression mean score (twin) | 3943 | 2.31 | 1.07 | 4 | 0.48 | -0.81 |
| BAQ Verbal Aggression mean score (twin) | 3943 | 3.04 | 0.86 | 4 | 0 | -0.5 |
| BAQ Anger mean score (twin) | 3943 | 2.01 | 1.06 | 4 | 0.95 | 0 |
| SANS overall total score (twin) | 4466 | 3.18 | 4.24 | 29 | 2.31 | 6.73 |
| SPEQ Paranoia total score (twin) | 3686 | 9.82 | 11.36 | 74 | 1.99 | 4.8 |
| SPEQ Hallucinations total score (twin) | 3686 | 1.66 | 4.07 | 44 | 4.56 | 27.37 |

### Supplementary Table 2: Descriptive statistics for school-level administrative environment measures in the whole sample

| Age 12 |  |  |  |  |  |  |
| --- | --- | --- | --- | --- | --- | --- |
|  | n | mean | sd | range | skew | kurtosis |
| Authorised Absence (%) | 5412 | 3.29 | 3.98 | 100 | 5.63 | 85.72 |
| Unauthorised Absence (%) | 5412 | 0.14 | 1.09 | 50 | 29.46 | 1141.81 |
| Overall Absence (%) | 5412 | 3.43 | 4.19 | 100 | 5.5 | 75.34 |
| School level Authorised Absence (%) | 3405 | 5.78 | 1.24 | 31.07 | 3.21 | 57.89 |
| School level Unauthorised Absence (%) | 3321 | 1.19 | 1.1 | 24.41 | 4.71 | 68.28 |
| School level Overall Absence (%) | 3321 | 7.36 | 2.00 | 45.07 | 3.61 | 58.88 |
| School level Persistent Absentees (%) | 3321 | 5.66 | 3.34 | 69.35 | 2.94 | 41.68 |
| Pupil Teacher Ratio | 5491 | 6.02 | 3.03 | 85.8 | 1.31 | 57.81 |
| Pupils Taking FSM (%) | 5098 | 6.45 | 6.64 | 85.4 | 2.88 | 13.17 |
| Pupils FSM Eligible (%) | 5098 | 8.86 | 8.45 | 73.3 | 2.36 | 7.48 |
| Pupils SEN Statemented (%) | 5491 | 2.33 | 7.04 | 100 | 12.76 | 169.43 |
| Pupils SEN No Statement (%) | 5491 | 3.2 | 8.34 | 93.3 | 1.87 | 8.8 |
| Pupil WBRI Pupils (White British or Irish) (%) | 5098 | 91.2 | 20.51 | 100 | -2.54 | 6.48 |
| Pupils First Language is English (%) | 5098 | 93.6 | 18.06 | 100 | -3.81 | 15.2 |
| Pupils Language is Not English (%) | 5098 | 6.23 | 1.39 | 100 | 3.96 | 20.23 |
| Overall effectiveness (Ofsted) | 5393 | 2.2 | 0.8 | 3 | 0.23 | -0.45 |
| Pupils achievement (aggregated) (Ofsted) | 5393 | 2.23 | 0.78 | 3 | 0.21 | -0.34 |
| Behaviour and safety of pupils (Ofsted) | 5363 | 1.97 | 0.71 | 3 | 0.25 | -0.44 |
| Quality of teaching (Ofsted) | 5393 | 2.25 | 0.68 | 3 | 0.19 | -0.04 |
| Leadership and management (Ofsted) | 5393 | 2.06 | 0.75 | 3 | 0.18 | -0.56 |
| Effectiveness of partnerships in promoting learning and wellbeing (Ofsted) | 5216 | 1.69 | 0.65 | 3 | 0.46 | -0.45 |
| The quality of pupils learning and their progress (Ofsted) | 5216 | 2.22 | 0.77 | 3 | 0.2 | -0.33 |
| The quality of learning for pupils with special educational needs and or disability (Ofsted) | 5216 | 2.14 | 0.72 | 3 | 0.13 | -0.39 |
| The extent of pupils spiritual moral social and cultural development (Ofsted) | 5246 | 1.86 | 0.7 | 3 | 0.25 | -0.8 |
| The extent to which pupils adopt healthy lifestyles (Ofsted) | 5246 | 1.84 | 0.64 | 3 | 0.22 | -0.42 |
| The extent to which pupils feel safe (Ofsted) | 5246 | 1.81 | 0.64 | 3 | 0.23 | -0.49 |
| Pupils attendance (Ofsted) | 5216 | 2.24 | 0.8 | 3 | -0.03 | -0.76 |
| The extent to which pupils contribute to the school and wider community (Ofsted) | 5246 | 1.68 | 0.68 | 3 | 0.55 | -0.57 |
| The extent to which pupils develop workplace and other skills (Ofsted) | 5246 | 1.94 | 0.75 | 3 | 0.31 | -0.59 |
| The extent to which the curriculum meets pupils needs (Ofsted) | 5246 | 1.96 | 0.7 | 3 | 0.17 | -0.56 |
| The effectiveness of care guidance and support (Ofsted) | 5246 | 1.81 | 0.7 | 3 | 0.35 | -0.71 |
| The effectiveness with which the school promotes equality of opportunity (Ofsted) | 5216 | 2.01 | 0.77 | 3 | 0.25 | -0.65 |
| The effectiveness with which the school deploys resources to achieve value (Ofsted) | 5216 | 2.1 | 0.8 | 3 | 0.28 | -0.52 |
| The effectiveness of the governing body in challenging and supporting (Ofsted) | 5216 | 2.02 | 0.72 | 3 | 0.2 | -0.47 |
| Headcount | 5491 | 1139.89 | 385.77 | 2756 | 0.15 | 0.47 |
| Boys Headcount | 5491 | 569.31 | 271.31 | 1577 | -0.2 | 0.41 |
| Girls Headcount | 5491 | 570.58 | 271.17 | 1746 | 0.24 | 1 |

| Age 16 |  |  |  |  |  |  |
| --- | --- | --- | --- | --- | --- | --- |
|  | n | mean | sd | range | skew | kurtosis |
| Authorised Absence (%) | 5381 | 4.1 | 4.91 | 80.46 | 4.37 | 41.12 |
| Unauthorised Absence (%) | 5381 | 0.69 | 3.33 | 87.83 | 14.17 | 276.12 |
| Overall Absence (%) | 5381 | 4.79 | 6.29 | 94.74 | 5.03 | 45.14 |
| School level Authorised Absence (%) | 4737 | 5.22 | 0.92 | 10.3 | 0.41 | 1.67 |
| School level Unauthorised Absence (%) | 4737 | 1.24 | 0.99 | 9.7 | 1.92 | 6.49 |
| School level Overall Absence (%) | 4737 | 6.45 | 1.39 | 14.7 | 0.81 | 2.92 |
| School level Persistent Absentees (%) | 1203 | 4.1 | 2.25 | 16 | 1.2 | 2.32 |
| Pupil Teacher Ratio | 1317 | 5.3 | 2.62 | 19.4 | -1.6 | 3.58 |
| Pupils Taking FSM (%) | 5484 | 8.28 | 7.29 | 100 | 2.29 | 9.86 |
| Pupils FSM Eligible (%) | 5494 | 8.86 | 8.84 | 100 | 1.94 | 5.89 |
| Pupils SEN Statemented (%) | 5891 | 4.33 | 10.45 | 100 | 5.62 | 39.81 |
| Pupils SEN No Statement (%) | 5891 | 4.14 | 9.95 | 100 | 4.03 | 19.69 |
| Pupil WBRI Pupils (White British or Irish) (%) | 5494 | 91.0 | 21.86 | 100 | -2.19 | 4.42 |
| Pupils First Language is English (%) | 5494 | 93.3 | 17.53 | 100 | -3.53 | 13.67 |
| Pupils Language is Not English (%) | 5494 | 7.59 | 11.53 | 99.9 | 3.04 | 11.06 |
| Overall effectiveness (Ofsted) | 5393 | 2.24 | 0.82 | 3 | 0.25 | -0.47 |
| Pupils achievement (aggregated) (Ofsted) | 5393 | 2.19 | 0.77 | 3 | 0.24 | -0.31 |
| Behaviour and safety of pupils (Ofsted) | 5363 | 1.99 | 0.70 | 3 | 0.27 | -0.46 |
| Quality of teaching (Ofsted) | 5393 | 2.21 | 0.7 | 3 | 0.17 | -0.05 |
| Leadership and management (Ofsted) | 5393 | 2.1 | 0.71 | 3 | 0.22 | -0.58 |
| Effectiveness of partnerships in promoting learning and wellbeing (Ofsted) | 5216 | 1.65 | 0.66 | 3 | 0.46 | -0.45 |
| The quality of pupils learning and their progress (Ofsted) | 5216 | 2.26 | 0.76 | 3 | 0.24 | -0.36 |
| The quality of learning for pupils with special educational needs and or disability (Ofsted) | 5216 | 2.14 | 0.78 | 3 | 0.12 | -0.34 |
| The extent of pupils spiritual moral social and cultural development (Ofsted) | 5246 | 1.84 | 0.72 | 3 | 0.23 | -0.84 |
| The extent to which pupils adopt healthy lifestyles (Ofsted) | 5246 | 1.89 | 0.65 | 3 | 0.23 | -0.46 |
| The extent to which pupils feel safe (Ofsted) | 5246 | 1.88 | 0.64 | 3 | 0.21 | -0.50 |
| Pupils attendance (Ofsted) | 5216 | 2.28 | 0.82 | 3 | -0.05 | -0.72 |
| The extent to which pupils contribute to the school and wider community (Ofsted) | 5246 | 1.71 | 0.68 | 3 | 0.55 | -0.51 |
| The extent to which pupils develop workplace and other skills (Ofsted) | 5246 | 1.98 | 0.71 | 3 | 0.34 | -0.61 |
| The extent to which the curriculum meets pupils needs (Ofsted) | 5246 | 1.92 | 0.68 | 3 | 0.21 | -0.55 |
| The effectiveness of care guidance and support (Ofsted) | 5246 | 1.85 | 0.72 | 3 | 0.34 | -0.67 |
| The effectiveness with which the school promotes equality of opportunity (Ofsted) | 5216 | 2.08 | 0.76 | 3 | 0.22 | -0.66 |
| The effectiveness with which the school deploys resources to achieve value (Ofsted) | 5216 | 2.11 | 0.78 | 3 | 0.31 | -0.51 |
| The effectiveness of the governing body in challenging and supporting (Ofsted) | 5216 | 2.07 | 0.71 | 3 | 0.18 | -0.44 |
| Headcount | 5904 | 1146.22 | 397.16 | 2564 | 0.2 | 0.23 |
| Boys Headcount | 5904 | 574.74 | 274.81 | 1655 | -0.12 | 0.38 |
| Girls Headcount | 5904 | 571.48 | 268.7 | 1756 | 0.27 | 0.83 |

### Supplementary Table 3: Descriptive statistics for perceived school environment measures in the whole sample

| Age 7 |  |  |  |  |  |  |
| --- | --- | --- | --- | --- | --- | --- |
|  | n | mean | sd | range | skew | kurtosis |
| Feelings about school (parent) | 5112 | 4.47 | 0.81 | 4 | -1.76 | 3.11 |

| Age 9 |  |  |  |  |  |  |
| --- | --- | --- | --- | --- | --- | --- |
|  | n | mean | sd | range | skew | kurtosis |
| CEQ Friends/Peer Context (parent) | 2474 | 1.48 | 0.41 | 2 | -0.36 | -0.46 |
| CEQ Friends/Peer Context (teacher) | 2043 | 1.7 | 0.37 | 2 | -1.18 | 1.09 |
| CEQ Friends/Peer Context (child) | 2439 | 1.35 | 0.44 | 2 | -0.43 | -0.1 |
| CEQ Classroom Satisfaction (parent) | 2485 | 1.64 | 0.4 | 2 | -1.06 | 0.52 |
| CEQ Classroom Satisfaction (teacher) | 2042 | 1.7 | 0.39 | 2 | -1.22 | 0.77 |
| CEQ Classroom Satisfaction (child) | 2448 | 1.49 | 0.47 | 2 | -0.84 | 0.14 |
| CEQ Teachers (parent) | 2483 | 1.73 | 0.38 | 2 | -1.36 | 1.19 |
| CEQ Teachers (child) | 2445 | 1.59 | 0.45 | 2 | -1.1 | 0.75 |
| CEQ Negative Affect (parent) | 2484 | 0.27 | 0.39 | 2 | 1.69 | 2.69 |
| CEQ Negative Affect (child) | 2443 | 0.28 | 0.43 | 2 | 1.75 | 2.8 |
| CEQ Adventure (parent) | 2485 | 1.4 | 0.45 | 2 | -0.38 | -0.66 |
| CEQ Adventure (child) | 2445 | 1.16 | 0.54 | 2 | -0.18 | -0.77 |
| CEQ Opportunity (parent) | 2482 | 1.73 | 0.32 | 1.75 | -1.15 | 0.65 |
| CEQ Opportunity (child) | 2446 | 1.74 | 0.34 | 2 | -1.55 | 2.47 |
| CEQ Acceptance (parent) | 2448 | 1.48 | 0.46 | 2 | -0.75 | 0.08 |
| CEQ Acceptance (child) | 2485 | 1.77 | 0.35 | 2 | -1.78 | 3.18 |
| Class size | 2048 | 2.21 | 0.54 | 2 | 0.09 | -0.16 |
| Homework: nights per week (teacher) | 2033 | 2.33 | 1.31 | 5 | 0.8 | -0.32 |
| Homework: usually finishes (teacher) | 2026 | 3.6 | 0.69 | 4 | -1.9 | 3.84 |
| Homework: involves others (teacher) | 1995 | 0.51 | 0.5 | 1 | -0.06 | -2 |

| Age 16 |  |  |  |  |  |  |
| --- | --- | --- | --- | --- | --- | --- |
|  | n | mean | sd | range | skew | kurtosis |
| School Engagement: Teacher-Student Relations (child) | 2187 | 2.91 | 0.74 | 3 | -0.61 | -0.2 |
| School Engagement: Control/Relevance of School Work (child) | 2185 | 2.86 | 0.66 | 3 | -0.51 | -0.11 |
| School Engagement: Peer Support for Learning (child) | 2183 | 2.89 | 0.75 | 3 | -0.58 | 0.01 |
| School Engagement: Future Aspirations/Goals (child) | 2183 | 3.27 | 0.97 | 3 | -1.31 | 0.41 |
| PISA Homework Behaviour scale (child) | 2203 | 4.51 | 1.1 | 6 | -0.64 | 0.25 |
| PISA Homework Feedback scale (child) | 2186 | 4.99 | 1.74 | 9 | -0.07 | 0.05 |
| PISA Attitudes to School overall mean score (child) | 2203 | 3.25 | 0.58 | 3 | -0.78 | 0.42 |
| Life Satisfaction School mean score (child) | 2309 | 4.34 | 0.99 | 5 | -0.75 | 0.44 |
| PISA Maths Interest overall | 2191 | 2.55 | 0.95 | 3 | -0.09 | -1.04 |
| PISA Time Spent on Maths total | 2168 | 4.43 | 1.7 | 12 | 0.38 | 1.52 |
| EWQB Classroom Environment, work in small groups | 2183 | 1.2 | 0.7 | 3 | 0.54 | 0.5 |
| EWQB Classroom Environment , help each other | 2169 | 1.92 | 0.79 | 3 | -0.27 | -0.5 |
| EWQB Classroom Environment, first to answer | 2176 | 1.85 | 0.89 | 3 | -0.22 | -0.87 |
| EWQB Classroom Environment, first to finish | 2178 | 1.86 | 0.93 | 3 | -0.32 | -0.88 |
| EWQB Classroom Environment, show each other work | 2173 | 1.85 | 0.89 | 3 | -0.28 | -0.76 |
| EWQB Classroom Environment, tell each other reports | 2173 | 2.05 | 0.81 | 3 | -0.46 | -0.46 |
| EWQB Classroom Environment, makes work interesting | 2176 | 1.73 | 0.87 | 3 | -0.15 | -0.71 |
| EWQB Classroom Environment, teacher likes work | 2169 | 1.95 | 0.78 | 3 | -0.29 | -0.49 |
| EWQB Classroom Environment, teacher explains why | 2171 | 1.74 | 0.91 | 3 | -0.19 | -0.82 |
| EWQB Classroom Environment, wait a long time | 2171 | 1.29 | 0.83 | 3 | 0.6 | -0.09 |
| EWQB Classroom Environment, shows an interest | 2174 | 1.96 | 0.88 | 3 | -0.39 | -0.71 |
| EWQB Classroom Environment, express opinions | 2172 | 1.84 | 0.86 | 3 | -0.27 | -0.66 |
| EWQB Classroom Environment, continues teaching | 2172 | 2.19 | 0.85 | 3 | -0.75 | -0.33 |
| EWQB Classroom Environment, does a lot to help | 2174 | 2.19 | 0.84 | 3 | -0.74 | -0.27 |
| EWQB Classroom Environment, checks homework | 2168 | 2.19 | 0.84 | 3 | -0.71 | -0.36 |
| EWQB Classroom Environment, cannot work well | 2171 | 0.73 | 0.7 | 3 | 0.79 | 0.71 |
| WQB Classroom Environment, do not listen | 2173 | 0.88 | 0.72 | 3 | 0.73 | 0.84 |
| EWQB Classroom Environment, noise and disorder | 2165 | 1.03 | 0.78 | 3 | 0.71 | 0.49 |
| EWQB Classroom Environment, doing nothing | 2173 | 1.33 | 0.95 | 3 | 0.36 | -0.77 |

### Supplementary Table 4: Descriptive statistics for mental health measures for males and females separately, with results of ANOVA testing for sex differences

| Age 7 |  |  |  |  |  |  |  |  |  |
| --- | --- | --- | --- | --- | --- | --- | --- | --- | --- |
| variable | male_mean | male_sd | male_n | female_mean | female_sd | female_n | F_value | p_value | r_squared |
| SDQ prosocial total (parent) | 8.46 | 1.60 | 2779 | 7.85 | 1.87 | 2344 | 155.36 | 3.76E-35 | 0.03 |
| SDQ hyperactivity (parent) | 3.08 | 2.35 | 2778 | 3.86 | 2.63 | 2344 | 128.61 | 1.84E-29 | 0.02 |
| SDQ conduct total (parent) | 1.49 | 1.51 | 2779 | 1.75 | 1.64 | 2344 | 32.54 | 1.23E-08 | 0.006 |
| SDQ peer problem total (parent) | 0.85 | 1.27 | 2779 | 1.05 | 1.52 | 2344 | 27.73 | 1.45E-07 | 0.005 |
| SDQ emotion total (parent) | 2.31 | 1.90 | 2779 | 1.98 | 1.76 | 2344 | 38.85 | 4.92E-10 | 0.008 |
| SDQ prosocial total (teacher) | 7.91 | 2.12 | 2292 | 6.80 | 2.42 | 1962 | 252.34 | 3.02E-55 | 0.06 |
| SDQ hyperactivity total (teacher) | 2.10 | 2.18 | 2293 | 3.37 | 2.77 | 1963 | 275.08 | 6.47E-60 | 0.06 |
| SDQ conduct total (teacher) | 0.49 | 1.08 | 2291 | 0.82 | 1.43 | 1961 | 75.74 | 4.54E-18 | 0.02 |
| SDQ peer problem total (teacher) | 0.92 | 1.36 | 2291 | 1.13 | 1.55 | 1959 | 20.91 | 4.93E-06 | 0.005 |
| SDQ emotion total (teacher) | 1.28 | 1.79 | 2278 | 1.20 | 1.68 | 1956 | 2.43 | 0.12 | 0.0006 |
| Social (ASD) total (parent) | 2.96 | 2.16 | 2779 | 3.34 | 2.49 | 2344 | 33.64 | 7.01E-09 | 0.007 |
| Non-Social (ASD) total (parent) | 3.58 | 2.05 | 2779 | 3.64 | 2.19 | 2344 | 0.99 | 0.31 | 0.0001 |
| Social (ASD) total (teacher) | 2.64 | 2.39 | 2292 | 3.43 | 2.78 | 1959 | 97.87 | 7.83E-23 | 0.02 |
| Non-Social (ASD) total (teacher) | 2.66 | 1.62 | 2289 | 2.83 | 1.97 | 1961 | 9.91 | 0.002 | 0.002 |

| Age 9 |  |  |  |  |  |  |  |  |  |
| --- | --- | --- | --- | --- | --- | --- | --- | --- | --- |
|  | male_mean | male_sd | male_n | female_mean | female_sd | female_n | F_value | p_value | r_squared |
| SDQ Prosocial scale (parent) | 8.59 | 1.46 | 1371 | 7.88 | 1.90 | 1124 | 112.77 | 8.52E-26 | 0.04 |
| SDQ Hyperactivity scale (parent) | 2.72 | 2.07 | 1367 | 3.58 | 2.51 | 1125 | 86.50 | 2.96E-20 | 0.03 |
| SDQ Conduct scale (parent) | 1.09 | 1.30 | 1369 | 1.41 | 1.51 | 1125 | 32.52 | 1.31E-08 | 0.01 |
| SDQ Peer Problem scale (parent) | 0.93 | 1.37 | 1369 | 1.11 | 1.63 | 1125 | 8.98 | 0.003 | 0.004 |
| SDQ Emotion scale (parent) | 1.90 | 1.97 | 1369 | 1.52 | 1.85 | 1124 | 23.50 | 1.33E-06 | 0.009 |
| SDQ Prosocial scale (child self-report) | 8.28 | 1.67 | 1371 | 7.37 | 1.89 | 1115 | 162.88 | 3.53E-36 | 0.06 |
| SDQ Hyperactivity scale (child self-report) | 3.58 | 2.18 | 1370 | 4.09 | 2.34 | 1113 | 31.02 | 2.82E-08 | 0.012 |
| SDQ Conduct scale (child self-report) | 1.98 | 1.74 | 1369 | 2.32 | 1.90 | 1112 | 21.42 | 3.87E-06 | 0.009 |
| SDQ Peer Problem scale (child self-report) | 1.89 | 1.74 | 1369 | 1.98 | 1.75 | 1099 | 1.57 | 0.21 | 0.0006 |
| SDQ Emotion scale (child self-report) | 3.43 | 2.40 | 1363 | 2.97 | 2.31 | 1114 | 22.77 | 1.93E-06 | 0.009 |
| SDQ Prosocial scale (teacher) | 8.17 | 1.93 | 1124 | 6.99 | 2.39 | 926 | 152.17 | 8.92E-34 | 0.07 |
| SDQ Hyperactivity scale (teacher) | 1.86 | 1.95 | 1122 | 3.10 | 2.65 | 923 | 148.17 | 5.84E-33 | 0.07 |
| SDQ Conduct scale (teacher) | 0.29 | 0.80 | 1124 | 0.68 | 1.34 | 923 | 64.69 | 1.47E-15 | 0.03 |
| SDQ Peer Problem scale (teacher) | 0.74 | 1.26 | 1125 | 0.99 | 1.62 | 927 | 15.55 | 8.29E-05 | 0.008 |
| SDQ Emotion scale (teacher) | 1.39 | 1.79 | 1126 | 1.25 | 1.77 | 926 | 3.34 | 0.07 | 0.002 |
| CAST Social scale (parent) | 2.15 | 1.72 | 1371 | 2.67 | 1.91 | 1123 | 50.42 | 1.61E-12 | 0.02 |
| CAST Non-Social scale (parent) | 1.88 | 1.42 | 1369 | 2.29 | 1.62 | 1122 | 43.74 | 4.55E-11 | 0.02 |
| CAST Communication scale (parent) | 2.09 | 1.83 | 1371 | 2.49 | 2.14 | 1122 | 25.19 | 5.56E-07 | 0.01 |
| CAST Social scale (child self-report) | 4.13 | 2.31 | 1331 | 4.77 | 2.30 | 1075 | 45.91 | 1.55E-11 | 0.02 |
| CAST Non-Social scale (child self-report) | 3.86 | 2.02 | 1338 | 4.02 | 2.15 | 1074 | 3.69 | 0.05 | 0.002 |
| CAST Communication scale (child self-report) | 3.16 | 2.53 | 1339 | 3.53 | 2.55 | 1075 | 12.76 | 0.0004 | 0.005 |
| CAST Social scale (teacher) | 2.24 | 1.93 | 1125 | 2.88 | 2.32 | 925 | 46.73 | 1.07E-11 | 0.02 |
| CAST Non-Social scale (teacher) | 1.45 | 1.31 | 1125 | 1.90 | 1.68 | 925 | 46.69 | 1.09E-11 | 0.02 |
| CAST Communication scale (teacher) | 1.81 | 1.88 | 1126 | 2.61 | 2.51 | 927 | 67.15 | 4.37E-16 | 0.03 |
| APSD Narcissism scale (parent) | 1.62 | 1.87 | 1369 | 2.01 | 2.05 | 1125 | 25.18 | 5.57E-07 | 0.01 |
| APSD Impulsivity scale (parent) | 2.87 | 1.90 | 1371 | 3.56 | 2.17 | 1125 | 71.35 | 5.00E-17 | 0.02 |
| APSD Narcissism scale (teacher) | 0.85 | 1.74 | 1125 | 1.37 | 2.23 | 927 | 34.77 | 4.32E-09 | 0.01 |
| APSD Impulsivity scale (teacher) | 1.04 | 1.47 | 1126 | 2.02 | 2.12 | 926 | 149.06 | 3.81E-33 | 0.07 |

| Age 12 |  |  |  |  |  |  |  |  |  |
| --- | --- | --- | --- | --- | --- | --- | --- | --- | --- |
| variable | male_mean | male_sd | male_n | female_mean | female_sd | female_n | F_value | p_value | r squared |
| SDQ Emotion scale (parent-rated) | 1.89 | 1.95 | 2431 | 1.69 | 1.88 | 2055 | 12.23 | 0.0004 | 0.002 |
| SDQ Emotion scale (teacher-rated) | 1.22 | 1.80 | 2038 | 1.14 | 1.76 | 1664 | 1.85 | 0.17 | 0.0005 |
| SDQ Emotion scale (child self-report) | 2.38 | 2.11 | 2430 | 1.98 | 1.95 | 2050 | 42.82 | 6.66E-11 | 0.009 |
| SDQ behaviour problems scale (parent-rated) | 6.25 | 4.75 | 2431 | 7.57 | 5.28 | 2056 | 77.80 | 1.60E-18 | 0.01 |
| SDQ behaviour problems scale (teacher-rated) | 3.90 | 4.24 | 2040 | 5.63 | 5.18 | 1668 | 123.33 | 3.26E-28 | 0.03 |
| SDQ behaviour problems scale (child self-report) | 8.33 | 5.26 | 2431 | 9.35 | 5.37 | 2050 | 41.24 | 1.48E-10 | 0.009 |
| Mood and Feelings scale (parent) | 1.17 | 2.44 | 2431 | 1.10 | 2.17 | 2055 | 1.09 | 0.29 | 0.0002 |
| Mood and Feelings scale (parent) | 2.26 | 3.39 | 2439 | 2.28 | 3.09 | 2058 | 0.02 | 0.87 | 5.10E-06 |
| APSD (Anti-social personality disorder) overall scale (parent) | 6.45 | 4.08 | 2438 | 7.86 | 4.50 | 2057 | 119.52 | 1.78E-27 | 0.02 |
| APSD (Anti-social personality disorder) overall scale (teacher) | 3.76 | 3.90 | 2033 | 6.06 | 5.58 | 1657 | 215.63 | 1.73E-47 | 0.05 |
| CAST overall scale (parent) | 4.19 | 3.03 | 2494 | 5.39 | 3.65 | 2133 | 149.12 | 8.88E-34 | 0.03 |
| CAST overall scale (teacher) | 4.18 | 3.18 | 2015 | 5.41 | 3.95 | 1654 | 110.26 | 1.96E-25 | 0.02 |
| Conners ADHD overall scale (parent) | 7.94 | 7.28 | 2435 | 11.37 | 9.39 | 2058 | 190.46 | 1.84E-42 | 0.04 |
| SDQ Prosocial scale (parent) | 8.82 | 1.47 | 2438 | 8.27 | 1.74 | 2059 | 130.13 | 9.78E-30 | 0.02 |
| SDQ Prosocial scale (teacher) | 8.50 | 1.83 | 2023 | 7.53 | 2.13 | 1653 | 217.19 | 8.34E-48 | 0.05 |
| SDQ Prosocial scale (child) | 7.95 | 1.72 | 2431 | 6.96 | 1.90 | 2052 | 330.49 | 2.60E-71 | 0.06 |
| SDQ Hyperactivity scale (parent) | 2.24 | 1.96 | 2430 | 3.28 | 2.40 | 2056 | 253.34 | 1.56E-55 | 0.05 |
| SDQ Hyperactivity scale (teacher) | 1.46 | 1.88 | 2039 | 2.67 | 2.67 | 1668 | 260.63 | 1.03E-56 | 0.06 |
| SDQ Hyperactivity scale (child self-report) | 3.07 | 2.15 | 2431 | 3.85 | 2.36 | 2050 | 134.23 | 1.32E-30 | 0.02 |
| SDQ Conduct scale (parent) | 1.17 | 1.37 | 2431 | 1.37 | 1.48 | 2056 | 22.302 | 2.40E-06 | 0.004 |
| SDQ Conduct scale (teacher) | 0.37 | 0.97 | 2041 | 0.67 | 1.39 | 1669 | 56.97 | 5.53E-14 | 0.01 |
| SDQ Conduct scale (child self-report) | 1.64 | 1.48 | 2431 | 2.06 | 1.70 | 2051 | 77.03 | 2.35E-18 | 0.01 |
| SDQ Peer Problems scale (parent) | 0.95 | 1.37 | 2430 | 1.23 | 1.61 | 2056 | 39.74 | 3.18E-10 | 0.008 |
| SDQ Peer Problems scale (teacher) | 0.85 | 1.43 | 2035 | 1.14 | 1.64 | 1668 | 32.44 | 1.32E-08 | 0.008 |
| SDQ Peer Problems scale (child self-report) | 1.22 | 1.55 | 2431 | 1.44 | 1.59 | 2051 | 22.05 | 2.72E-06 | 0.004 |
| APSD Callous-Unemotional scale (parent) | 2.81 | 1.83 | 2438 | 3.23 | 1.95 | 2057 | 57.46 | 4.15E-14 | 0.01 |
| APSD Callous-Unemotional scale (teacher) | 2.23 | 1.90 | 2033 | 3.02 | 2.14 | 1649 | 140.76 | 6.95E-32 | 0.03 |
| APSD Narcissism scale (parent) | 1.28 | 1.58 | 2438 | 1.62 | 1.78 | 2056 | 44.96 | 2.25E-11 | 0.009 |
| APSD Narcissism scale (teacher) | 0.62 | 1.47 | 2031 | 1.18 | 2.16 | 1661 | 88.09 | 1.06E-20 | 0.02 |
| APSD Impulsivity scale (parent) | 2.21 | 1.76 | 2430 | 2.82 | 1.89 | 2053 | 123.05 | 3.15E-28 | 0.02 |
| APSD Impulsivity scale (teacher) | 0.87 | 1.37 | 2029 | 1.74 | 2.03 | 1656 | 238.25 | 3.93E-52 | 0.06 |
| CAST Social scale (parent) | 1.28 | 1.31 | 2493 | 1.89 | 1.58 | 2133 | 207.95 | 3.79E-46 | 0.04 |
| CAST Social scale (teacher) | 2.29 | 1.73 | 2011 | 2.98 | 1.99 | 1644 | 126.96 | 5.67E-29 | 0.03 |
| CAST Non-Social scale (parent) | 1.23 | 1.19 | 2489 | 1.52 | 1.32 | 2132 | 59.58 | 1.43E-14 | 0.01 |
| CAST Non-Social scale (teacher) | 0.69 | 0.95 | 1940 | 0.90 | 1.18 | 1599 | 34.98 | 3.63E-09 | 0.009 |
| CAST Communication scale (parent) | 1.67 | 1.67 | 2493 | 1.96 | 1.91 | 2133 | 31.86 | 1.75E-08 | 0.006 |
| CAST Communication scale (teacher) | 1.21 | 1.56 | 2020 | 1.53 | 1.93 | 1658 | 30.60 | 3.39E-08 | 0.008 |
| Conners Hyperactivity-Impulsivity scale (parent) | 3.49 | 3.73 | 2435 | 4.79 | 4.77 | 2057 | 104.53 | 2.85E-24 | 0.02 |
| Conners Inattention scale (parent) | 4.44 | 4.46 | 2437 | 6.58 | 5.59 | 2056 | 202.21 | 6.40E-45 | 0.04 |

| Age 16 |  |  |  |  |  |  |  |  |  |
| --- | --- | --- | --- | --- | --- | --- | --- | --- | --- |
| variable | male_mean | male_sd | male_n | female_mean | female_sd | female_n | F_value | p_value | r_squared |
| SDQ Hyperactivity scale (parent) | 1.90 | 1.74 | 2399 | 2.64 | 2.09 | 1883 | 158.14 | 1.22E-35 | 0.04 |
| SDQ Conduct scale (parent) | 1.16 | 1.35 | 2403 | 1.24 | 1.40 | 1885 | 4.21 | 0.04 | 0.001 |
| SDQ Prosocial scale (parent) | 8.52 | 1.81 | 2401 | 7.95 | 2.02 | 1884 | 95.33 | 2.74E-22 | 0.02 |
| SDQ Emotion scale (child) | 3.35 | 2.30 | 2401 | 1.95 | 1.86 | 1872 | 454.96 | 5.19E-96 | 0.09 |
| SDQ Peer Problems scale (child) | 1.47 | 1.44 | 2401 | 1.60 | 1.50 | 1872 | 8.31 | 0.003 | 0.001 |
| SDQ Hyperactivity scale (child) | 3.52 | 2.31 | 2401 | 3.63 | 2.35 | 1872 | 2.14 | 0.14 | 0.001 |
| SDQ Conduct scale (child) | 1.52 | 1.44 | 2401 | 1.73 | 1.50 | 1871 | 22.11 | 2.64E-06 | 0.005 |
| SDQ Prosocial scale (child) | 7.65 | 1.77 | 2400 | 6.56 | 1.93 | 1871 | 367.63 | 1.14E-78 | 0.07 |
| MFQ total scale (child) | 4.29 | 4.79 | 2401 | 2.66 | 3.48 | 1875 | 152.83 | 1.61E-34 | 0.03 |
| MFQ total scale (parent) | 1.14 | 2.56 | 2401 | 0.77 | 1.90 | 1886 | 27.20 | 1.92E-07 | 0.006 |
| ARBQ Anxiety total scale (parent) | 4.17 | 4.47 | 2402 | 2.78 | 3.67 | 1886 | 119.14 | 2.23E-27 | 0.02 |
| Conners Impulsivity scale (parent) | 2.36 | 3.20 | 2398 | 2.70 | 3.64 | 1885 | 10.52 | 0.001 | 0.002 |
| Conners Inattention scale (parent) | 3.24 | 4.20 | 2398 | 5.16 | 5.30 | 1885 | 175.32 | 2.98E-39 | 0.03 |
| Conners Emotional Lability scale (parent) | 1.39 | 1.90 | 2400 | 1.04 | 1.62 | 1886 | 39.15 | 4.30E-10 | 0.009 |
| ICUT Callous scale (child) | 4.70 | 3.19 | 593 | 6.18 | 3.75 | 371 | 42.22 | 1.31E-10 | 0.04 |
| ICUT Callous scale (parent) | 4.20 | 3.33 | 2399 | 5.19 | 3.68 | 1884 | 84.92 | 4.75E-20 | 0.01 |
| ICUT Unemotional scale (child) | 7.41 | 3.24 | 593 | 8.06 | 2.89 | 370 | 9.91 | 0.001 | 0.01 |
| ICUT Unemotional scale (parent) | 4.69 | 2.79 | 2401 | 5.77 | 2.94 | 1887 | 150.56 | 4.83E-34 | 0.03 |
| ICUT Uncaring scale (child) | 5.60 | 3.39 | 593 | 7.73 | 3.70 | 370 | 83.65 | 3.44E-19 | 0.08 |
| ICUT Uncaring scale (parent) | 6.70 | 4.56 | 2401 | 8.54 | 4.82 | 1887 | 162.45 | 1.50E-36 | 0.03 |
| Autism Quotient Social scale (child) | 6.98 | 4.27 | 2402 | 6.92 | 3.91 | 1872 | 0.21 | 0.64 | 5.03E-05 |
| Autism Quotient Social scale (parent) | 6.86 | 4.51 | 2402 | 7.77 | 4.85 | 1886 | 40.39 | 2.29E-10 | 0.009 |
| Autism Quotient Attention Switching scale (parent) | 7.72 | 4.00 | 2401 | 8.84 | 4.33 | 1886 | 76.22 | 3.57E-18 | 0.01 |
| Autism Quotient Imagination scale (parent) | 3.79 | 3.06 | 2396 | 4.89 | 3.47 | 1871 | 119.44 | 1.93E-27 | 0.02 |
| Autism Quotient Attention to Detail scale (child) | 4.50 | 3.35 | 2401 | 5.44 | 3.63 | 1872 | 76.18 | 3.64E-18 | 0.01 |
| Autism Quotient Attention to Detail scale (parent) | 3.99 | 3.58 | 2397 | 4.85 | 3.99 | 1875 | 54.61 | 1.76E-13 | 0.01 |
| Subjective Happiness Scale overall mean score (child ) | 5.13 | 0.97 | 2395 | 5.11 | 0.90 | 1876 | 0.70 | 0.40 | 0.0001 |
| CASI Anxiety total scale (child) | 9.49 | 6.28 | 2401 | 6.15 | 4.88 | 1876 | 359.51 | 4.81E-77 | 0.08 |
| SWAN Inattention mean score (child ) | 4.72 | 0.85 | 593 | 4.74 | 0.87 | 373 | 0.10 | 0.74 | 0.0001 |
| SWAN Hyperactivity mean score (child ) | 4.83 | 1.01 | 592 | 4.87 | 0.98 | 373 | 0.42 | 0.51 | 0.0004 |

| Age 21 |  |  |  |  |  |  |  |  |  |
| --- | --- | --- | --- | --- | --- | --- | --- | --- | --- |
| variable | male_mean | male_sd | male_n | female_mean | female_sd | male_n | F_value | p_value | r_squared |
| SDQ Emotion total score (parent) | 2.86 | 2.46 | 2515 | 1.76 | 1.93 | 1957 | 260.68 | 4.86E-57 | 0.05 |
| SDQ Emotion total score (twin) | 4.05 | 2.69 | 2504 | 2.73 | 2.48 | 1507 | 240.81 | 8.71E-53 | 0.05 |
| SDQ Conduct total score (parent) | 1.22 | 1.32 | 2518 | 1.18 | 1.23 | 1961 | 0.83 | 0.36 | 0.0001 |
| SDQ Conduct total score (twin) | 1.50 | 1.28 | 2504 | 1.62 | 1.29 | 1507 | 7.59 | 0.005 | 0.001 |
| SDQ Hyperactivity total score (parent) | 1.68 | 1.86 | 2517 | 2.18 | 2.11 | 1956 | 69.84 | 8.46E-17 | 0.01 |
| SDQ Hyperactivity total score (twin) | 3.17 | 2.15 | 2504 | 3.40 | 2.17 | 1507 | 10.56 | 0.001 | 0.002 |
| SDQ Peer problems total score (parent) | 1.38 | 1.70 | 2516 | 1.39 | 1.77 | 1959 | 0.04 | 0.84 | 8.55E-06 |
| SDQ Peer problems total score (twin) | 2.13 | 1.83 | 2504 | 2.16 | 1.74 | 1507 | 0.25 | 0.61 | 6.38E-05 |
| SDQ Prosocial total score (parent) | 8.35 | 1.85 | 2518 | 7.90 | 2.04 | 1963 | 57.60 | 3.88E-14 | 0.01 |
| SDQ Prosocial total score (twin) | 8.04 | 1.65 | 2504 | 7.01 | 2.03 | 1508 | 305.13 | 6.53E-66 | 0.07 |
| MFQ overall total score (twin) | 4.71 | 4.20 | 2505 | 3.71 | 3.62 | 1505 | 59.34 | 1.65E-14 | 0.01 |
| MFQ overall total score (twin) | 4.17 | 3.99 | 2322 | 3.03 | 3.36 | 1323 | 77.21 | 2.32E-18 | 0.02 |
| Conners Impulsivity total score (parent) | 2.43 | 3.57 | 2516 | 2.53 | 3.81 | 1958 | 0.90 | 0.34 | 0.0002 |
| Conners Inattention total score (parent) | 3.29 | 3.98 | 2514 | 4.64 | 4.99 | 1962 | 101.36 | 1.36E-23 | 0.02 |
| General Anxiety overall total score (twin) | 8.05 | 7.66 | 2322 | 5.80 | 6.63 | 1322 | 79.40 | 7.84E-19 | 0.02 |
| BAQ Physical Aggression mean score (twin) | 2.09 | 0.99 | 2429 | 2.65 | 1.08 | 1514 | 279.91 | 9.34E-61 | 0.06 |
| BAQ Verbal Aggression mean score (twin) | 2.96 | 0.87 | 2429 | 3.16 | 0.82 | 1514 | 49.30 | 2.57E-12 | 0.01 |
| BAQ Anger mean score (twin) | 2.04 | 1.08 | 2429 | 1.93 | 1.01 | 1514 | 10.06 | 0.001 | 0.002 |
| SANS overall total score (twin) | 2.91 | 3.95 | 2507 | 3.51 | 4.55 | 1959 | 22.30 | 2.39E-06 | 0.004 |
| SPEQ Paranoia total score (twin) | 10.04 | 11.78 | 2339 | 9.43 | 10.58 | 1347 | 2.48 | 0.11 | 0.001 |
| SPEQ Hallucinations total score (twin) | 1.61 | 4.08 | 2339 | 1.72 | 4.04 | 1347 | 0.60 | 0.43 | 0.0001 |

### Supplementary Table 5: Descriptive statistics for school-level administrative measures for males and females separately, ANOVA testing for sex differences

| Age 12 |  |  |  |  |  |  |  |  |  |
| --- | --- | --- | --- | --- | --- | --- | --- | --- | --- |
| variable | male_mean | male_sd | male_n | female_mean | female_sd | female_n | F_value | p_value | r_squared |
| Authorised Absence (%) | 3.30 | 3.68 | 2942 | 3.27 | 4.30 | 2470 | 0.07 | 0.78 | 1.37E-05 |
| Unauthorised Absence (%) | 0.14 | 1.28 | 2942 | 0.13 | 0.81 | 2470 | 0.03 | 0.85 | 6.09E-06 |
| Overall Absence (%) | 3.44 | 3.93 | 2942 | 3.41 | 4.47 | 2470 | 0.09 | 0.75 | 1.73E-05 |
| School level Authorised Absence (%) | 5.78 | 1.19 | 1824 | 5.76 | 1.28 | 1581 | 0.19 | 0.66 | 5.62E-05 |
| School level Unauthorised Absence (%) | 1.22 | 1.15 | 1777 | 1.14 | 1.01 | 1544 | 3.9 | 0.05 | 0.001 |
| School level Overall Absence (%) | 7.41 | 2.00 | 1777 | 7.30 | 1.99 | 1544 | 2.47 | 0.11 | 0.001 |
| School level Persistent Absentees (%) | 5.74 | 3.16 | 1777 | 5.55 | 3.52 | 1544 | 2.85 | 0.09 | 0.001 |
| Pupil Teacher Ratio | 16.11 | 3.14 | 2977 | 15.89 | 2.74 | 2514 | 7.36 | 0.001 | 0.001 |
| Pupils Taking FSM (%) | 6.48 | 6.44 | 2770 | 6.41 | 6.86 | 2328 | 0.11 | 0.72 | 2.34E-05 |
| Pupils FSM Eligible (%) | 8.95 | 8.25 | 2770 | 8.74 | 8.67 | 2328 | 0.74 | 0.38 | 0.0001 |
| Pupils SEN Statemented (%) | 2.04 | 4.86 | 2977 | 2.67 | 8.94 | 2514 | 10.97 | 0.001 | 0.001 |
| Pupils SEN No Statement (%) | 13.17 | 8.24 | 2977 | 13.23 | 8.46 | 2514 | 0.07 | 0.79 | 1.28E-05 |
| Pupil WBRI Pupils (White British or Irish) (%) | 83.57 | 20.51 | 2770 | 83.44 | 20.51 | 2328 | 0.04 | 0.82 | 9.77E-06 |
| Pupils First Language is English (%) | 91.37 | 17.91 | 2770 | 91.34 | 18.24 | 2328 | 0.002 | 0.96 | 4.21E-07 |
| Pupils Language is Not English (%) | 6.35 | 11.64 | 2770 | 6.06 | 11.08 | 2328 | 0.80 | 0.36 | 0.0001 |
| Overall effectiveness (Ofsted) | 2.21 | 0.78 | 2938 | 2.19 | 0.81 | 2455 | 0.38 | 0.53 | 7.13E-05 |
| Pupils achievement (aggregated) (Ofsted) | 2.23 | 0.76 | 2938 | 2.22 | 0.79 | 2455 | 0.10 | 0.74 | 1.96E-05 |
| Behaviour and safety of pupils (Ofsted) | 1.97 | 0.71 | 2921 | 1.95 | 0.70 | 2442 | 1.69 | 0.19 | 0.0003 |
| Quality of teaching (Ofsted) | 2.25 | 0.66 | 2938 | 2.24 | 0.69 | 2455 | 0.61 | 0.43 | 0.0001 |
| Leadership and management (Ofsted) | 2.06 | 0.73 | 2938 | 2.05 | 0.76 | 2455 | 0.39 | 0.52 | 7.37E-05 |
| Effectiveness of partnerships in promoting learning and wellbeing (Ofsted) | 1.67 | 0.64 | 2840 | 1.70 | 0.64 | 2376 | 2.09 | 0.14 | 0.0004 |
| The quality of pupils learning and their progress (Ofsted) | 2.22 | 0.75 | 2840 | 2.22 | 0.78 | 2376 | 0.00 | 0.92 | 1.59E-06 |
| The quality of learning for pupils with special educational needs and or disability (Ofsted) | 2.13 | 0.71 | 2840 | 2.13 | 0.72 | 2376 | 0.04 | 0.82 | 9.45E-06 |
| The extent of pupils spiritual moral social and cultural development (Ofsted) | 1.85 | 0.70 | 2857 | 1.86 | 0.70 | 2389 | 0.46 | 0.49 | 8.79E-05 |
| The extent to which pupils adopt healthy lifestyles (Ofsted) | 1.83 | 0.64 | 2857 | 1.84 | 0.64 | 2389 | 0.03 | 0.84 | 7.55E-06 |
| The extent to which pupils feel safe (Ofsted) | 1.80 | 0.64 | 2857 | 1.82 | 0.63 | 2389 | 1.47 | 0.22 | 0.0002 |
| Pupils attendance (Ofsted) | 2.24 | 0.80 | 2840 | 2.22 | 0.79 | 2376 | 1.20 | 0.27 | 0.0002 |
| The extent to which pupils contribute to the school and wider community (Ofsted) | 1.67 | 0.67 | 2857 | 1.69 | 0.69 | 2389 | 2.14 | 0.14 | 0.0004 |
| The extent to which pupils develop workplace and other skills (Ofsted) | 1.93 | 0.74 | 2857 | 1.94 | 0.74 | 2389 | 0.38 | 0.53 | 7.26E-05 |
| The extent to which the curriculum meets pupils needs (Ofsted) | 1.97 | 0.69 | 2857 | 1.94 | 0.69 | 2389 | 1.64 | 0.19 | 0.0003 |
| The effectiveness of care guidance and support (Ofsted) | 1.80 | 0.70 | 2857 | 1.81 | 0.70 | 2389 | 0.44 | 0.50 | 8.46E-05 |
| The effectiveness with which the school promotes equality of opportunity (Ofsted) | 2.00 | 0.76 | 2840 | 2.00 | 0.78 | 2376 | 0.04 | 0.82 | 8.87E-06 |
| The effectiveness with which the school deploys resources to achieve value (Ofsted) | 2.09 | 0.79 | 2840 | 2.10 | 0.81 | 2376 | 0.03 | 0.84 | 7.60E-06 |
| The effectiveness of the governing body in challenging and supporting (Ofsted) | 2.02 | 0.70 | 2840 | 2.01 | 0.73 | 2376 | 0.37 | 0.54 | 7.14E-05 |
| Headcount | 1139.57 | 379.01 | 2977 | 1140.26 | 393.68 | 2514 | 0.004 | 0.94 | 7.78E-07 |
| Boys Headcount | 506.52 | 280.62 | 2977 | 643.66 | 239.47 | 2514 | 371.75 | 3.32E-80 | 0.06 |
| Girls Headcount | 633.05 | 259.45 | 2977 | 496.59 | 266.13 | 2514 | 368.21 | 1.74E-79 | 0.06 |

| Age 16 |  |  |  |  |  |  |  |  |  |
| --- | --- | --- | --- | --- | --- | --- | --- | --- | --- |
| variable | male_mean | male_sd | male_n | female_mean | female_sd | female_n | F_value | p_value | r_squared |
| Authorised Absence (%) | 3.30 | 3.68 | 2942 | 3.27 | 4.30 | 2470 | 0.07 | 0.78 | 1.37E-05 |
| Unauthorised Absence (%) | 0.14 | 1.28 | 2942 | 0.13 | 0.81 | 2470 | 0.03 | 0.85 | 6.09E-06 |
| Overall Absence (%) | 3.44 | 3.93 | 2942 | 3.41 | 4.47 | 2470 | 0.09 | 0.75 | 1.73E-05 |
| School level Authorised Absence (%) | 4.41 | 5.32 | 2935 | 3.71 | 4.32 | 2446 | 27.37 | 1.74E-07 | 0.005 |
| School level Unauthorised Absence (%) | 0.75 | 3.97 | 2935 | 0.61 | 2.32 | 2446 | 2.24 | 0.13 | 0.0004 |
| School level Overall Absence (%) | 5.17 | 6.99 | 2935 | 4.33 | 5.29 | 2446 | 23.72 | 1.15E-06 | 0.004 |
| School level Persistent Absentees (%) | 5.22 | 0.92 | 2591 | 5.20 | 0.92 | 2146 | 0.62 | 0.42 | 0.0001 |
| Pupil Teacher Ratio | 1.27 | 1.00 | 2591 | 1.19 | 0.96 | 2146 | 7.98 | 0.004 | 0.001 |
| Pupils Taking FSM (%) | 6.50 | 1.39 | 2591 | 6.39 | 1.39 | 2146 | 6.50 | 0.01 | 0.001 |
| Pupils FSM Eligible (%) | 4.16 | 2.28 | 702 | 4.01 | 2.20 | 501 | 1.37 | 0.24 | 0.001 |
| Pupils SEN Statemented (%) | 5.78 | 1.19 | 1824 | 5.76 | 1.28 | 1581 | 0.19 | 0.66 | 5.62E-05 |
| Pupils SEN No Statement (%) | 1.22 | 1.15 | 1777 | 1.14 | 1.01 | 1544 | 3.91 | 0.04 | 0.001 |
| Pupil WBRI Pupils (White British or Irish) (%) | 87.41 | 2.00 | 1777 | 7.30 | 1.99 | 1544 | 2.47 | 0.11 | 0.001 |
| Pupils First Language is English (%) | 95.74 | 3.16 | 1777 | 5.55 | 3.52 | 1544 | 2.85 | 0.09 | 0.001 |
| Pupils Language is Not English (%) | 16.11 | 3.14 | 2977 | 15.89 | 2.87 | 2514 | 7.36 | 0.006 | 0.001 |
| Overall effectiveness (Ofsted) | 2.26 | 0.74 | 2770 | 2.24 | 0.86 | 2328 | 0.11 | 0.72 | 2.34E-05 |
| Pupils achievement (aggregated) (Ofsted) | 2.21 | 0.65 | 2770 | 2.19 | 0.67 | 2328 | 0.74 | 0.38 | 0.0001 |
| Behaviour and safety of pupils (Ofsted) | 2.08 | 0.86 | 2977 | 1.89 | 0.94 | 2514 | 10.97 | 0.001 | 0.0001 |
| Quality of teaching (Ofsted) | 2.17 | 0.70 | 2977 | 2.21 | 0.66 | 2514 | 0.07 | 0.79 | 1.28E-05 |
| Leadership and management (Ofsted) | 2.09 | 0.51 | 2770 | 2.12 | 0.61 | 2328 | 0.04 | 0.82 | 9.77E-06 |
| Effectiveness of partnerships in promoting learning and wellbeing (Ofsted) | 1.67 | 0.71 | 2770 | 1.64 | 0.74 | 2328 | 0.002 | 0.96 | 4.21E-07 |
| The quality of pupils learning and their progress (Ofsted) | 2.3 | 0.64 | 2770 | 2.23 | 0.68 | 2328 | 0.80 | 0.36 | 0.0001 |
| The quality of learning for pupils with special educational needs and or disability (Ofsted) | 2.11 | 0.69 | 758 | 2.15 | 0.79 | 559 | 0.02 | 0.87 | 2.01E-05 |
| The extent of pupils spiritual moral social and cultural development (Ofsted) | 1.87 | 0.72 | 2983 | 1.76 | 0.68 | 2501 | 1.19 | 0.27 | 0.0002 |
| The extent to which pupils adopt healthy lifestyles (Ofsted) | 1.91 | 0.60 | 2988 | 1.87 | 0.68 | 2506 | 1.22 | 0.26 | 0.0002 |
| The extent to which pupils feel safe (Ofsted) | 1.87 | 0.73 | 3197 | 1.98 | 0.76 | 2694 | 5.44 | 0.01 | 0.001 |
| Pupils attendance (Ofsted) | 2.23 | 0.79 | 3197 | 2.27 | 0.75 | 2694 | 0.96 | 0.32 | 0.0001 |
| The extent to which pupils contribute to the school and wider community (Ofsted) | 1.69 | 0.71 | 2988 | 1.74 | 0.72 | 2506 | 0.03 | 0.85 | 5.69E-06 |
| The extent to which pupils develop workplace and other skills (Ofsted) | 1.99 | 0.64 | 2988 | 1.96 | 0.78 | 2506 | 0.03 | 0.84 | 7.14E-06 |
| The extent to which the curriculum meets pupils needs (Ofsted) | 1.92 | 0.72 | 2988 | 1.93 | 0.69 | 2506 | 1.36 | 0.24 | 0.0002 |
| The effectiveness of care guidance and support (Ofsted) | 1.84 | 0.78 | 2938 | 1.86 | 0.71 | 2455 | 0.38 | 0.53 | 7.13E-05 |
| The effectiveness with which the school promotes equality of opportunity (Ofsted) | 2.09 | 0.76 | 2938 | 2.03 | 0.79 | 2455 | 0.10 | 0.74 | 1.96E-05 |
| The effectiveness with which the school deploys resources to achieve value (Ofsted) | 2.17 | 0.71 | 2921 | 2.09 | 0.70 | 2442 | 1.69 | 0.19 | 0.0003 |
| The effectiveness of the governing body in challenging and supporting (Ofsted) | 2.08 | 0.66 | 2938 | 2.04 | 0.69 | 2455 | 0.61 | 0.43 | 0.0001 |
| Headcount | 1142.99 | 393.18 | 3205 | 1150.06 | 401.86 | 2699 | 0.46 | 0.49 | 7.87E-05 |
| Boys Headcount | 513.21 | 282.12 | 3205 | 647.81 | 246.71 | 2699 | 373.70 | 8.81E-81 | 0.05 |
| Girls Headcount | 629.78 | 259.83 | 3205 | 502.24 | 262.58 | 2699 | 349.56 | 7.91E-76 | 0.05 |

### Supplementary Table 6: Descriptive statistics for perceived school environment measures for males and females separately, ANOVA testing for sex differences

| variable | male_mean | male_sd | male_n | female_mean | female_sd | female_n | F_value | p_value | r_squared |
| --- | --- | --- | --- | --- | --- | --- | --- | --- | --- |
| Age 7 | | | | | | | | | |
| Feelings about school | 4.56 | 0.75 | 2772 | 4.35 | 0.86 | 2340 | 84.15 | 6.49E-20 | 0.01 |
| Age 9 | | | | | | | | | |
| Friends/Peer context (parent) | 1.54 | 0.37 | 1361 | 1.38 | 0.42 | 1113 | 98.77 | 7.55E-23 | 0.03 |
| Friends/Peer context (teacher) | 1.77 | 0.31 | 1122 | 1.60 | 0.40 | 921 | 107.27 | 1.55E-24 | 0.04 |
| Friends/Peer context (self) | 1.43 | 0.41 | 1351 | 1.25 | 0.43 | 1088 | 103.94 | 6.24E-24 | 0.04 |
| Classroom satisfaction (parent) | 1.70 | 0.37 | 1368 | 1.57 | 0.41 | 1117 | 63.13 | 2.90E-15 | 0.02 |
| Classroom satisfaction (teacher) | 1.76 | 0.34 | 1121 | 1.61 | 0.43 | 921 | 77.30 | 3.04E-18 | 0.03 |
| Classroom satisfaction (self) | 1.55 | 0.43 | 1356 | 1.40 | 0.49 | 1092 | 65.77 | 7.92E-16 | 0.02 |
| Teacher(parent) | 1.73 | 0.38 | 1366 | 1.73 | 0.36 | 1117 | 0.04 | 0.83 | 1.69E-05 |
| Teacher (self) | 1.62 | 0.44 | 1355 | 1.54 | 0.45 | 1090 | 21.94 | 2.95E-06 | 0.01 |
| Negative affect (parent) | 0.28 | 0.40 | 1366 | 0.25 | 0.37 | 1118 | 3.23 | 0.07 | 0.001 |
| Negative affect (child) | 0.27 | 0.41 | 1355 | 0.28 | 0.44 | 1088 | 0.07 | 0.78 | 2.98E-05 |
| Adventure (parent) | 1.47 | 0.43 | 1367 | 1.30 | 0.45 | 1118 | 84.60 | 7.51E-20 | 0.03 |
| Adventure (child) | 1.22 | 0.52 | 1354 | 1.08 | 0.55 | 1091 | 39.84 | 3.25E-10 | 0.01 |
| Opportunity (parent) | 1.73 | 0.33 | 1366 | 1.71 | 0.31 | 1116 | 1.99 | 0.15 | 0.0008 |
| Opportunity (child) | 1.76 | 0.31 | 1353 | 1.69 | 0.35 | 1093 | 23.93 | 1.06E-06 | 0.01 |
| Acceptance (parent) | 1.48 | 0.45 | 1357 | 1.46 | 0.46 | 1091 | 1.66 | 0.19 | 0.0006 |
| Acceptance (child) | 1.79 | 0.33 | 1368 | 1.74 | 0.36 | 1117 | 11.61 | 0.0006 | 0.004 |
| Homework: nights per week | 2.31 | 1.29 | 1117 | 2.34 | 1.33 | 916 | 0.31 | 0.57 | 0.0001 |
| Homework: usually finishes | 3.65 | 0.62 | 1114 | 3.51 | 0.76 | 912 | 20.03 | 8.03E-06 | 0.009 |
| Homework: involves others | 0.51 | 0.50 | 1097 | 0.51 | 0.50 | 898 | 0.004 | 0.94 | 2.11E-06 |
| Age 16 | | | | | | | | | |
| School Engagement: Teacher-Student Relations (child) | 2.90 | 0.73 | 1282 | 2.92 | 0.75 | 905 | 0.65 | 0.41 | 0.0002 |
| School Engagement: Control/Relevance of School Work (child) | 2.88 | 0.66 | 1280 | 2.82 | 0.65 | 905 | 3.96 | 0.04 | 0.001 |
| School Engagement: Peer Support for Learning (child) | 2.90 | 0.76 | 1279 | 2.86 | 0.72 | 904 | 1.88 | 0.16 | 0.0008 |
| School Engagement: Future Aspirations/Goals (child) | 3.29 | 0.95 | 1278 | 3.22 | 0.99 | 905 | 2.48 | 0.11 | 0.001 |
| PISA Homework Behaviour scale (child) | 4.55 | 1.094776 | 1288 | 4.44 | 1.10 | 915 | 5.51 | 0.01 | 0.002 |
| PISA Homework Feedback scale (child) | 4.92 | 1.73 | 1282 | 5.08 | 1.74 | 904 | 4.48 | 0.03 | 0.002 |
| PISA Attitudes to School overall mean score (child) | 3.25 | 0.58 | 1287 | 3.25 | 0.58 | 916 | 0.002 | 0.95 | 1.31E-06 |
| Life Satisfaction School mean score (child) | 4.36 | 1.00 | 1349 | 4.31 | 0.96 | 960 | 1.23 | 0.26 | 0.0005 |
| PISA Maths Interest overall | 2.42 | 0.95 | 1286 | 2.73 | 0.90 | 905 | 59.93 | 1.49E-14 | 0.02 |
| PISA Time Spent on Maths total | 4.41 | 1.64 | 1275 | 4.44 | 1.77 | 893 | 0.11 | 0.74 | 5.08E-05 |
| EWQB Classroom Environment, work in small groups | 1.18 | 0.69 | 1281 | 1.22 | 0.70 | 902 | 1.63 | 0.20 | 0.0007 |
| EWQB Classroom Environment , help each other | 1.96 | 0.78 | 1271 | 1.86 | 0.78 | 898 | 9.08 | 0.002 | 0.004 |
| EWQB Classroom Environment, first to answer | 1.79 | 0.91 | 1275 | 1.92 | 0.85 | 901 | 11.71 | 0.0006 | 0.005 |
| EWQB Classroom Environment, first to finish | 1.79 | 0.95 | 1277 | 1.96 | 0.89 | 901 | 17.11 | 3.65E-05 | 0.007 |
| EWQB Classroom Environment, show each other work | 1.80 | 0.88 | 1275 | 1.90 | 0.89 | 898 | 7.53 | 0.006 | 0.003 |
| EWQB Classroom Environment, tell each other reports | 2 | 0.81 | 1275 | 2.12 | 0.79 | 898 | 11.95 | 0.0005 | 0.005 |
| EWQB Classroom Environment, makes work interesting | 1.67 | 0.87 | 1276 | 1.82 | 0.85 | 900 | 16.07 | 6.29E-05 | 0.007 |
| EWQB Classroom Environment, teacher likes work | 1.95 | 0.77 | 1271 | 1.95 | 0.78 | 898 | 1.04E-05 | 0.99 | 4.81E-09 |
| EWQB Classroom Environment, teacher explains why | 1.71 | 0.92 | 1272 | 1.78 | 0.88 | 899 | 3.05 | 0.08 | 0.001 |
| EWQB Classroom Environment, wait a long time | 1.32 | 0.85 | 1274 | 1.24 | 0.78 | 897 | 4.14 | 0.04 | 0.001 |
| EWQB Classroom Environment, shows an interest | 1.92 | 0.90 | 1276 | 2.00 | 0.83 | 898 | 4.79 | 0.02 | 0.002 |
| EWQB Classroom Environment, express opinions | 1.80 | 0.88 | 1277 | 1.88 | 0.83 | 895 | 4.65 | 0.03 | 0.002 |
| EWQB Classroom Environment, continues teaching | 2.18 | 0.87 | 1274 | 2.19 | 0.82 | 898 | 0.04 | 0.83 | 1.92E-05 |
| EWQB Classroom Environment, does a lot to help | 2.15 | 0.86 | 1276 | 2.24 | 0.78 | 898 | 6.42 | 0.01 | 0.002 |
| EWQB Classroom Environment, checks homework | 2.17 | 0.85 | 1273 | 2.21 | 0.81 | 895 | 1.11 | 0.29 | 0.0005 |
| EWQB Classroom Environment, cannot work well | 0.71 | 0.69 | 1275 | 0.74 | 0.70 | 896 | 0.93 | 0.33 | 0.0004 |
| WQB Classroom Environment, do not listen | 0.90 | 0.73 | 1276 | 0.84 | 0.69 | 897 | 3.36 | 0.06 | 0.001 |
| EWQB Classroom Environment, noise and disorder | 1.05 | 0.80 | 1272 | 1 | 0.74 | 893 | 2.69 | 0.10 | 0.001 |
| EWQB Classroom Environment, doing nothing | 1.38 | 0.95 | 1274 | 1.24 | 0.93 | 899 | 12.45 | 0.0004 | 0.005 |

### Supplementary Table 7: Factor loadings and model fit statistics for confirmatory factor analyses (CFA) for the general factor of psychopathology

| Age 7 |  |  |  |  |
| --- | --- | --- | --- | --- |
|  | Estimate | Std.Err | z-value | P(>|z|) |
| P |  |  |  |  |
| SDQ hyperactivity (parent) | 0.33 | 0.02 | 21.26 | 0 |
| SDQ conduct total (parent) | 0.33 | 0.02 | 20.83 | 0 |
| SDQ hyperactivity total (teacher) | 0.58 | 0.02 | 35.87 | 0 |
| SDQ conduct total (teacher) | 0.58 | 0.02 | 36.36 | 0 |
| SDQ prosocial total (parent) | -0.23 | 0.02 | -14.76 | 0 |
| SDQ peer problem total (parent) | 0.42 | 0.02 | 27.03 | 0 |
| SDQ emotion total (parent) | 0.23 | 0.02 | 14.43 | 0 |
| SDQ prosocial total (teacher) | -0.65 | 0.02 | -43.04 | 0 |
| SDQ peer problem total (teacher) | 0.79 | 0.02 | 53.21 | 0 |
| SDQ emotion total (teacher) | 0.39 | 0.02 | 24.03 | 0 |
| Social (ASD) total (parent) | 0.41 | 0.02 | 26.51 | 0 |
| Non-Social (ASD) total (parent) | 0.16 | 0.02 | 10.38 | 0 |
| Social (ASD) total (teacher), | 0.91 | 0.02 | 64.29 | 0 |
| Non-Social (ASD) total (teacher) | 0.10 | 0.02 | 5.88 | 0 |
|  |  |  |  |  |
| Model fit: |  |  |  |  |
| AIC | 173166.08 |  |  |  |
| BIC | 173440.99 |  |  |  |
| CFI | 0.53 |  |  |  |
| RMSEA | 0.15 (0.14-0.16) | |  |  |

| Age 9 |  |  |  |  |
| --- | --- | --- | --- | --- |
|  | Estimate | Std.E | z-value | P(>|z|) |
| P |  |  |  |  |
| SDQ Prosocial scale (parent) | 0.61 | 0.017 | 31.20 | 0 |
| SDQ Hyperactivity scale (parent) | 0.60 | 0.017 | 30.45 | 0 |
| SDQ Conduct scale (parent) | 0.50 | 0.017 | 24.37 | 0 |
| SDQ Peer Problem scale (parent) | -0.31 | 0.018 | -14.506 | 0 |
| SDQ Emotion scale (parent) | 0.39 | 0.018 | 18.421 | 0 |
| SDQ Prosocial scale (child self-report) | -0.19 | 0.019 | -8.659 | 0 |
| SDQ Hyperactivity scale (child self-report) | 0.45 | 0.02 | 21.80 | 0 |
| SDQ Conduct scale (child self-report) | 0.49 | 0.02 | 23.80 | 0 |
| SDQ Peer Problem scale (child self-report) | 0.44 | 0.02 | 20.83 | 0 |
| SDQ Emotion scale (child self-report) | 0.37 | 0.02 | 17.57 | 0 |
| SDQ Prosocial scale (teacher) | -0.50 | 0.02 | -21.52 | 0 |
| SDQ Hyperactivity scale (teacher) | 0.64 | 0.02 | 28.96 | 0 |
| SDQ Conduct scale (teacher) | 0.60 | 0.02 | 26.33 | 0 |
| SDQ Peer Problem scale (teacher) | 0.52 | 0.02 | 22.74 | 0 |
| SDQ Emotion scale (teacher) | 0.31 | 0.02 | 13.05 | 0 |
| CAST Social scale (parent) | 0.35 | 0.02 | 16.70 | 0 |
| CAST Non-Social scale (parent) | 0.30 | 0.02 | 13.85 | 0 |
| CAST Communication scale (parent) | 0.54 | 0.02 | 26.71 | 0 |
| CAST Social scale (child self-report) | 0.27 | 0.02 | 12.31 | 0 |
| CAST Non-Social scale (child self-report) | 0.28 | 0.02 | 12.70 | 0 |
| CAST Communication scale (child self-report) | 0.43 | 0.02 | 20.19 | 0 |
| CAST Social scale (teacher) | 0.45 | 0.02 | 19.19 | 0 |
| CAST Non-Social scale (teacher) | 0.23 | 0.02 | 9.53 | 0 |
| CAST Communication scale (teacher) | 0.59 | 0.02 | 26.17 | 0 |
| APSD Narcissism scale (parent) | 0.53 | 0.02 | 26.02 | 0 |
| APSD Impulsivity scale (parent) | 0.64 | 0.02 | 32.70 | 0 |
| APSD Narcissism scale (teacher) | 0.53 | 0.02 | 22.76 | 0 |
| APSD Impulsivity scale (teacher) | 0.62 | 0.02 | 27.16 | 0 |
|  |  |  |  |  |
| Model fit: |  |  |  |  |
|  |  |  |  |  |
| AIC | 174297.4 |  |  |  |
| BIC | 174792.8 |  |  |  |
| CFI | 0.49 |  |  |  |
| RMSEA | 0.108 (0.106- 0.109) | |  |  |

| Age 12 |  |  |  |  |
| --- | --- | --- | --- | --- |
|  | Estimate | Std.Err | z-value | P(>|z|) |
| P |  |  |  |  |
| SDQ Emotion scale (parent-rated) | 0.47 | 0.02 | 31.51 | 0 |
| SDQ Emotion scale (teacher-rated) | 0.31 | 0.02 | 17.87 | 0 |
| SDQ Emotion scale (child self-report) | 0.36 | 0.02 | 23.69 | 0 |
| SDQ behaviour problems scale (parent-rated) | 0.83 | 0.01 | 65.24 | 0 |
| SDQ behaviour problems scale (teacher-rated) | 0.53 | 0.02 | 33.53 | 0 |
| SDQ behaviour problems scale (child self-report) | 0.64 | 0.01 | 45.17 | 0 |
| Mood and Feelings scale (parent) | 0.53 | 0.02 | 36.15 | 0 |
| Mood and Feelings scale (parent) | 0.43 | 0.02 | 28.66 | 0 |
| APSD (Anti-social personality disorder) overall scale (parent) | 0.73 | 0.01 | 54.26 | 0 |
| APSD (Anti-social personality disorder) overall scale (teacher) | 0.46 | 0.02 | 27.67 | 0 |
| CAST overall scale (parent) | 0.53 | 0.01 | 36.77 | 0 |
| CAST overall scale (teacher) | 0.27 | 0.02 | 15.96 | 0 |
| Conners ADHD overall scale (parent) | 0.82 | 0.01 | 63.19 | 0 |
| SDQ Prosocial scale (parent) | 0.37 | 0.02 | 24.11 | 0 |
| SDQ Prosocial scale (teacher) | -0.35 | 0.02 | -19.1 | 0 |
| SDQ Prosocial scale (child) | -0.20 | 0.02 | -13.00 | 0 |
| SDQ Hyperactivity scale (parent) | 0.77 | 0.01 | 58.66 | 0 |
| SDQ Hyperactivity scale (teacher) | 0.47 | 0.02 | 26.78 | 0 |
| SDQ Hyperactivity scale (child self-report) | 0.53 | 0.02 | 36.57 | 0 |
| SDQ Conduct scale (parent) | 0.63 | 0.01 | 45.43 | 0 |
| SDQ Conduct scale (teacher) | 0.42 | 0.02 | 24.05 | 0 |
| SDQ Conduct scale (child self-report) | 0.5 | 0.02 | 34.10 | 0 |
| SDQ Peer Problems scale (parent) | 0.49 | 0.02 | 33.15 | 0 |
| SDQ Peer Problems scale (teacher) | 0.32 | 0.02 | 17.95 | 0 |
| SDQ Peer Problems scale (child self-report) | 0.38 | 0.02 | 25.31 | 0 |
| APSD Callous-Unemotional scale (parent) | 0.43 | 0.02 | 29.00 | 0 |
| APSD Callous-Unemotional scale (teacher) | 0.35 | 0.02 | 19.00 | 0 |
| APSD Narcissism scale (parent) | 0.54 | 0.02 | 37.32 | 0 |
| APSD Narcissism scale (teacher) | 0.36 | 0.02 | 20.07 | 0 |
| APSD Impulsivity scale (parent) | 0.74 | 0.01 | 55.49 | 0 |
| APSD Impulsivity scale (teacher) | 0.46 | 0.02 | 26.49 | 0 |
| CAST Social scale (parent) | 0.25 | 0.02 | 16.27 | 0 |
| CAST Social scale (teacher) | 0.14 | 0.02 | 7.67 | 0 |
| CAST Non-Social scale (parent) | 0.29 | 0.02 | 19.13 | 0 |
| CAST Non-Social scale (teacher) | 0.10 | 0.02 | 5.04 | 0 |
| CAST Communication scale (parent) | 0.60 | 0.01 | 42.27 | 0 |
| CAST Communication scale (teacher) | 0.36 | 0.02 | 19.84 | 0 |
| Conners Hyperactivity-Impulsivity scale (parent) | 0.69 | 0.01 | 50.20 | 0 |
| Conners Inattention scale (parent) | 0.75 | 0.01 | 55.84 | 0 |
|  |  |  |  |  |
| Model fit: |  |  |  |  |
| AIC | 414673.34 |  |  |  |
| BIC | 415436.30 |  |  |  |
| CFI | 0.31 |  |  |  |
| RMSEA | 0.159 (0.158-0.159) | |  |  |

| Age 16 |  |  |  |  |
| --- | --- | --- | --- | --- |
|  | Estimate | Std.Err | z-value | P(>|z|) |
| P16 |  |  |  |  |
| SDQ Hyperactivity scale (parent) | 0.67 | 0.01 | 47.35 | 0 |
| SDQ Conduct scale (parent) | 0.66 | 0.01 | 46.95 | 0 |
| SDQ Prosocial scale (parent) | -0.55 | 0.02 | -36.89 | 0 |
| SDQ Emotion scale (child) | 0.44 | 0.02 | 17.87 | 0 |
| SDQ Peer Problems scale (child) | 0.39 | 0.03 | 15.93 | 0 |
| SDQ Hyperactivity scale (child) | 0.52 | 0.02 | 22.38 | 0 |
| SDQ Conduct scale (child) | 0.51 | 0.02 | 22.16 | 0 |
| SDQ Prosocial scale (child) | -0.32 | 0.03 | -12.74 | 0 |
| MFQ total scale (child) | 0.50 | 0.02 | 21.12 | 0 |
| MFQ total scale (parent) | 0.54 | 0.02 | 35.99 | 0 |
| ARBQ Anxiety total scale (parent) | 0.50 | 0.02 | 32.38 | 0 |
| Conners Impulsivity scale (parent) | 0.51 | 0.02 | 33.57 | 0 |
| Conners Inattention scale (parent) | 0.71 | 0.01 | 50.25 | 0 |
| Conners Emotional Lability scale (parent) | 0.63 | 0.02 | 43.46 | 0 |
| ICUT Callous scale (child) | 0.41 | 0.04 | 10.60 | 0 |
| ICUT Callous scale (parent) | 0.55 | 0.02 | 36.30 | 0 |
| ICUT Unemotional scale (child) | 0.26 | 0.04 | 6.62 | 0 |
| ICUT Unemotional scale (parent) | 0.35 | 0.02 | 22.13 | 0 |
| ICUT Uncaring scale (child) | 0.44 | 0.04 | 11.39 | 0 |
| ICUT Uncaring scale (parent) | 0.66 | 0.01 | 45.69 | 0 |
| Autism Quotient Social scale (child) | 0.30 | 0.03 | 11.87 | 0 |
| Autism Quotient Social scale (parent) | 0.42 | 0.02 | 26.81 | 0 |
| Autism Quotient Attention Switching scale (parent) | 0.57 | 0.02 | 38.58 | 0 |
| Autism Quotient Imagination scale (parent) | 0.43 | 0.02 | 28.01 | 0 |
| Autism Quotient Attention to Detail scale (child) | 0.10 | 0.03 | 3.96 | 0 |
| Autism Quotient Attention to Detail scale (parent) | 0.06 | 0.02 | 3.70 | 0 |
| Subjective Happiness Scale overall mean score (child ) | -0.43 | 0.02 | -17.85 | 0 |
| CASI Anxiety total scale (child) | 0.30 | 0.03 | 11.75 | 0 |
| SWAN Inattention mean score (child ) | -0.51 | 0.04 | -13.64 | 0 |
| SWAN Hyperactivity mean score (child ) | -0.44 | 0.04 | -11.68 | 0 |
|  |  |  |  |  |
| Model fit: |  |  |  |  |
| AIC | 228882.34 |  |  |  |
| BIC | 229455.35 |  |  |  |
| CFI | 0.55 |  |  |  |
| RMSEA | 0.092 (0.091-0.094) | |  |  |

| Age 21 | |  |  |  |
| --- | --- | --- | --- | --- |
|  | Estimate | Std.Err | z-value | P(>|z|) |
| P21 |  |  |  |  |
| SDQ Emotion total score (parent) | 0.55 | 0.02 | 36.56 | 0 |
| SDQ Emotion total score (twin) | 0.75 | 0.02 | 50.05 | 0 |
| SDQ Conduct total score (parent) | 0.44 | 0.02 | 28.05 | 0 |
| SDQ Conduct total score (twin) | 0.41 | 0.02 | 24.99 | 0 |
| SDQ Hyperactivity total score (parent) | 0.46 | 0.02 | 29.45 | 0 |
| SDQ Hyperactivity total score (twin) | 0.65 | 0.02 | 41.93 | 0 |
| SDQ Peer problems total score (parent) | 0.42 | 0.02 | 26.97 | 0 |
| SDQ Peer problems total score (twin) | 0.55 | 0.02 | 34.41 | 0 |
| SDQ Prosocial total score (parent) | 0.25 | 0.02 | 15.51 | 0 |
| SDQ Prosocial total score (twin) | -0.22 | 0.02 | -12.63 | 0 |
| MFQ overall total score (twin) | 0.78 | 0.02 | 52.97 | 0 |
| MFQ overall total score (twin) | 0.75 | 0.02 | 47.15 | 0 |
| Conners Impulsivity total score (parent) | 0.38 | 0.02 | 23.41 | 0 |
| Conners Inattention total score (parent) | 0.50 | 0.02 | 31.95 | 0 |
| General Anxiety overall total score (twin) | 0.67 | 0.02 | 40.81 | 0 |
| BAQ Physical Aggression mean score (twin) | 0.31 | 0.02 | 17.8 | 0 |
| BAQ Verbal Aggression mean score (twin) | 0.16 | 0.02 | 8.85 | 0 |
| BAQ Anger mean score (twin) | 0.48 | 0.02 | 28.57 | 0 |
| SANS overall total score (twin) | 0.48 | 0.02 | 27.67 | 0 |
| SPEQ Paranoia total score (twin) | 0.61 | 0.02 | 36.42 | 0 |
| SPEQ Hallucinations total score (twin) | 0.47 | 0.02 | 27.15 | 0 |
|  |  |  |  |  |
| Model fit: |  |  |  |  |
| AIC | 225276.72 |  |  |  |
| BIC | 225688.09 |  |  |  |
| CFI | 0.58 |  |  |  |
| RMSEA | 0.111(0.109-0.113) | |  |  |

### Supplementary Table 8: Variance in age 12 P-factor explained by all age 12 school-level administrative measures without factor analysis using linear regression models (robustness check)

| Model | Adjusted R2 | p-value |
| --- | --- | --- |
| Unadjusted | 0.03 | 3.072e-11 |
| Adjusted for 27 PGS | 0.02 | 2.70e-04 |
| Adjusted for PGS, SES | 0.01 | 2.645e-02 |
| Adjusted for PGS, SES, age 7 P-factor | 0.008 | 0.10000 |

Notes: PGS – polygenic scores, SES – socioeconomic status

### Supplementary Table 9: Variance in age 16 P-factor explained by all age 16 school-level administrative measures without factor analysis using linear regression models (robustness check)

| Model | Adjusted R2 | p-value |
| --- | --- | --- |
| Unadjusted | 0.06 | 2.200e-16 |
| Adjusted for 27 PGS | 0.04 | 3.54e-10 |
| Adjusted for PGS, SES | 0.03 | 2.557e-06 |
| Adjusted for PGS, SES, age 7 P-factor | 0.02 | 0.002 |

Notes: PGS – polygenic scores, SES – socioeconomic status.

### Supplementary Table 10: Variance in age 16 P-factor explained by all age 12 and16 school-level administrative measures without factor analysis using linear regression models (robustness check)

| Model | Adjusted R2 | p-value |
| --- | --- | --- |
| Unadjusted | 0.05 | 7.100e-13 |
| Adjusted for 27 PGS | 0.03 | 8.80e-04 |
| Adjusted for PGS, SES | 0.02 | 2.430e-02 |
| Adjusted for PGS, SES, age 7 P-factor | 0.005 | 0.28700 |

Notes: PGS – polygenic scores, SES – socioeconomic status.

### Supplementary Table 11: Variance in age 12 P-factor explained by all age 12 and16 school-level administrative measures without factor analysis using linear regression models (robustness check)

| Model | Adjusted R2 | p-value |
| --- | --- | --- |
| Unadjusted | 0.05 | 2.613e-15 |
| Adjusted for 27 PGS | 0.04 | 7.47e-07 |
| Adjusted for PGS, SES | 0.04 | 7.706e-06 |
| Adjusted for PGS, SES, age 7 P-factor | 0.03 | 0.00044 |

Notes: PGS – polygenic scores, SES – socioeconomic status.

### Supplementary Table 12: Penalised coefficients and summary statistics from contemporaneous penalised elastic net regressions at ages 12 and 16 (robustness checks)

| Age 12 Objective School Environment Coefficients |  |
| --- | --- |
|  | Coefficients |
| Authorised Absence (%) | 0.02 |
| Unauthorised Absence (%) | 0.02 |
| Overall Absence (%) | 0.04 |
| School level Authorised Absence (%) | 0 |
| School level Unauthorised Absence (%) | 0 |
| School level Overall Absence (%) | 0 |
| School level Persistent Absentees (%) | 0.02 |
| Pupil Teacher Ratio | -0.02 |
| Pupils Taking FSM (%) | 0.02 |
| Pupils FSM Eligible (%) | 0.03 |
| Pupils SEN Statemented (%) | 0.07 |
| Pupils SEN No Statement (%) | 0 |
| Pupil WBRI Pupils (White British or Irish) (%) | 0 |
| Pupils First Language is English (%) | 0 |
| Pupils Language is Not English (%) | 0 |
| Overall effectiveness (Ofsted) | 0 |
| Pupils’ achievement (aggregated) (Ofsted) | -0.05 |
| Behaviour and safety of pupils (Ofsted) | 0 |
| Quality of teaching (Ofsted) | 0 |
| Leadership and management (Ofsted) | 0 |
| Effectiveness of partnerships in promoting learning and wellbeing (Ofsted) | 0 |
| The quality of pupils learning and their progress (Ofsted) | 0 |
| The quality of learning for pupils with special educational needs and or disability (Ofsted) | 0 |
| The extent of pupils spiritual moral social and cultural development (Ofsted) | 0 |
| The extent to which pupils adopt healthy lifestyles (Ofsted) | 0 |
| The extent to which pupils feel safe (Ofsted) | 0 |
| Pupils attendance (Ofsted) | -0.0008 |
| The extent to which pupils contribute to the school and wider community (Ofsted) | 0 |
| The extent to which pupils develop workplace and other skills (Ofsted) | 0 |
| The extent to which the curriculum meets pupils needs (Ofsted) | 0 |
| The effectiveness of care guidance and support (Ofsted) | 0 |
| The effectiveness with which the school promotes equality of opportunity (Ofsted) | 0 |
| The effectiveness with which the school deploys resources to achieve value (Ofsted) | 0 |
| The effectiveness of the governing body in challenging and supporting (Ofsted) | 0 |
| Headcount | 0 |
| Boys Headcount | -0.0006 |
| Girls Headcount | 0 |

| Variance in P-factor at age 12 explained by school environment at age 12 | | | | |
| --- | --- | --- | --- | --- |
| R2 | alpha | lambda | N (training set) | N (test set) |
| 0.026 | 0.6 | 0.044858 | 1982 | 492 |

| Age 16 Objective School Environment Coefficients |  |
| --- | --- |
| Authorised Absence (%) | 0.05 |
| Unauthorised Absence (%) | 0.10 |
| Overall Absence (%) | 0.06 |
| School level Authorised Absence (%) | 0 |
| School level Unauthorised Absence (%) | 0 |
| School level Overall Absence (%) | 0 |
| Pupils Taking FSM (%) | 0.03 |
| Pupils FSM Eligible (%) | 0.04 |
| Pupils SEN Statemented (%) | 0.13 |
| Pupils SEN No Statement (%) | 0 |
| Pupil WBRI Pupils (White British or Irish) (%) | 0 |
| Pupils First Language is English (%) | 0 |
| Pupils Language is Not English (%) | 0 |
| Headcount | -0.02 |
| Boys Headcount | -0.01 |
| Girls Headcount | 0 |
| Overall effectiveness (Ofsted) | 0 |
| Pupils’ achievement (aggregated) (Ofsted) | 0 |
| Behaviour and safety of pupils (Ofsted) | 0 |
| Quality of teaching (Ofsted) | 0 |
| Leadership and management (Ofsted) | 0 |
| Effectiveness of partnerships in promoting learning and wellbeing (Ofsted) | 0 |
| The quality of pupils learning and their progress (Ofsted) | 0 |
| The quality of learning for pupils with special educational needs and or disability (Ofsted) | 0 |
| The extent of pupils spiritual moral social and cultural development (Ofsted) | 0 |
| The extent to which pupils adopt healthy lifestyles (Ofsted) | 0 |
| The extent to which pupils feel safe (Ofsted) | 0 |
| Pupils attendance (Ofsted) | 0 |
| The extent to which pupils contribute to the school and wider community (Ofsted) | 0 |
| The extent to which pupils develop workplace and other skills (Ofsted) | 0 |
| The extent to which the curriculum meets pupils needs (Ofsted) | 0 |
| The effectiveness of care guidance and support (Ofsted) | 0 |
| The effectiveness with which the school promotes equality of opportunity (Ofsted) | 0 |
| The effectiveness with which the school deploys resources to achieve value (Ofsted) | 0 |
| The effectiveness of the governing body in challenging and supporting (Ofsted) | 0.02 |

| Variance in P-factor at age 16 explained by objective school environment measures at age 16 | | | | |
| --- | --- | --- | --- | --- |
| R2 | alpha | lambda | N (training set) | N (test set) |
| 0.058 | 1 | 0.0111 | 2464 | 612 |

### Supplementary Table 13: Penalised coefficients and summary statistics from penalised elastic net regressions over development at ages 16 and 21(robustness checks)

| Age 12 & 16 Objective School Environment Coefficients for P-factor at 16 |  |
| --- | --- |
|  | Coefficients |
| Authorised Absence (%) 16 | 0.03 |
| Unauthorised Absence (%) 16 | 0.12 |
| Overall Absence (%) 16 | 0.06 |
| School level Authorised Absence (%) 16 | 0 |
| School level Unauthorised Absence (%) 16 | 0 |
| School level Overall Absence (%) 16 | 0 |
| Pupils Taking FSM (%) 16 | 0 |
| Pupils FSM Eligible (%) 16 | 0.04 |
| Pupils SEN Statemented (%) 16 | 0.07 |
| Pupils SEN No Statement (%) 16 | 0 |
| Pupil WBRI Pupils (White British or Irish) (%) 16 | 0 |
| Pupils First Language is English (%) 16 | 0 |
| Pupils Language is Not English (%) 16 | 0 |
| Headcount 16 | -0.01 |
| Boys Headcount 16 | -0.01 |
| Girls Headcount 16 | 0 |
| Overall effectiveness (Ofsted; 16) | 0 |
| Pupils’ achievement (aggregated) (Ofsted; 16) | 0 |
| Behaviour and safety of pupils (Ofsted; 16) | 0 |
| Quality of teaching (Ofsted; 16) | 0 |
| Leadership and management (Ofsted; 16) | 0 |
| Effectiveness of partnerships in promoting learning and wellbeing (Ofsted; 16) | 0 |
| The quality of pupils learning and their progress (Ofsted; 16) | 0 |
| The quality of learning for pupils with special educational needs and or disability (Ofsted; 16) | 0 |
| The extent of pupils spiritual moral social and cultural development (Ofsted; 16) | 0 |
| The extent to which pupils adopt healthy lifestyles (Ofsted; 16) | 0 |
| The extent to which pupils feel safe (Ofsted; 16) | 0 |
| Pupils attendance (Ofsted; 16) | 0 |
| The extent to which pupils contribute to the school and wider community (Ofsted; 16) | 0 |
| The extent to which pupils develop workplace and other skills (Ofsted; 16) | 0 |
| The extent to which the curriculum meets pupils needs (Ofsted; 16) | 0 |
| The effectiveness of care guidance and support (Ofsted; 16) | 0 |
| The effectiveness with which the school promotes equality of opportunity (Ofsted; 16) | 0 |
| The effectiveness with which the school deploys resources to achieve value (Ofsted; 16) | 0 |
| The effectiveness of the governing body in challenging and supporting (Ofsted; 16) | 0.009 |
| Authorised Absence (%) 12 | 0.006 |
| Unauthorised Absence (%) 12 | 0.03 |
| Overall Absence (%) 12 | 0 |
| School level Authorised Absence (%) 12 | 0.04 |
| School level Unauthorised Absence (%) 12 | 0 |
| School level Overall Absence (%) 12 | 0.01 |
| School level Persistent Absentees (%) 12 | 0 |
| Pupil Teacher Ratio age 12 | -0.05 |
| Pupils Taking FSM (%) 12 | 0.02 |
| Pupils FSM Eligible (%) 12 | 0 |
| Pupils SEN Statemented (%) 12 | 0.01 |
| Pupils SEN No Statement (%) 12 | 0 |
| Pupil WBRI Pupils (White British or Irish) (%) 12 | 0 |
| Pupils First Language is English (%) 12 | 0 |
| Pupils Language is Not English (%) 12 | 0 |
| Headcount 12 | 0 |
| Boys Headcount 12 | -0.03 |
| Girls Headcount 12 | 0 |
| Overall effectiveness (Ofsted; 12) | 0 |
| Pupils’ achievement (aggregated) (Ofsted; 12) | 0 |
| Behaviour and safety of pupils (Ofsted; 12) | 0 |
| Quality of teaching (Ofsted; 12) | 0 |
| Leadership and management (Ofsted; 12) | 0 |
| Effectiveness of partnerships in promoting learning and wellbeing (Ofsted;12) | 0 |
| The quality of pupils learning and their progress (Ofsted; 12) | 0 |
| The quality of learning for pupils with special educational needs and or disability (Ofsted; 12) | 0 |
| The extent of pupils spiritual moral social and cultural development (Ofsted; 12) | 0 |
| The extent to which pupils adopt healthy lifestyles (Ofsted; 12) | 0 |
| The extent to which pupils feel safe (Ofsted; 12) | 0 |
| Pupils’ attendance (Ofsted; 12) | 0 |
| The extent to which pupils contribute to the school and wider community (Ofsted; 12) | 0 |
| The extent to which pupils develop workplace and other skills (Ofsted;12) | 0 |
| The extent to which the curriculum meets pupils needs (Ofsted; 12) | 0 |
| The effectiveness of care guidance and support (Ofsted; 12) | 0 |
| The effectiveness with which the school promotes equality of opportunity (Ofsted; 12) | 0 |
| The effectiveness with which the school deploys resources to achieve value (Ofsted; 12) | 0 |
| The effectiveness of the governing body in challenging and supporting (Ofsted; 12) | 0 |

| Variance in P-factor at age 16 explained by objective school environment measures at ages 12 and 16 | | | | |
| --- | --- | --- | --- | --- |
| R2 | alpha | lambda | N (training set) | N (test set) |
| 0.044 | 0.3 | 0.058 | 1728 | 428 |

| Age 12 & 16 Objective School Environment Coefficients for P-factor at 21 |  |
| --- | --- |
|  | Coefficients |
| Authorised Absence (%) 16 | 0.09 |
| Unauthorised Absence (%) 16 | 0.06 |
| Overall Absence (%) 16 | 0.02 |
| School level Authorised Absence (%) 16 | 0 |
| School level Unauthorised Absence (%) 16 | 0 |
| School level Overall Absence (%) 16 | 0 |
| Pupils Taking FSM (%) 16 | 0 |
| Pupils FSM Eligible (%) 16 | 0.0004 |
| Pupils SEN Statemented (%) 16 | 0 |
| Pupils SEN No Statement (%) 16 | -0.01 |
| Pupil WBRI Pupils (White British or Irish) (%) 16 | -0.02 |
| Pupils First Language is English (%) 16 | 0 |
| Pupils Language is Not English (%) 16 | 0 |
| Headcount 16 | -0.01 |
| Boys Headcount 16 | 0 |
| Girls Headcount 16 | 0 |
| Overall effectiveness (Ofsted; 16) | 0 |
| Pupils’ achievement (aggregated) (Ofsted; 16) | 0 |
| Behaviour and safety of pupils (Ofsted; 16) | 0 |
| Quality of teaching (Ofsted; 16) | 0 |
| Leadership and management (Ofsted; 16) | 0 |
| Effectiveness of partnerships in promoting learning and wellbeing (Ofsted; 16) | -0.001 |
| The quality of pupils learning and their progress (Ofsted; 16) | 0 |
| The quality of learning for pupils with special educational needs and or disability (Ofsted; 16) | 0 |
| The extent of pupils spiritual moral social and cultural development (Ofsted; 16) | 0 |
| The extent to which pupils adopt healthy lifestyles (Ofsted; 16) | 0 |
| The extent to which pupils feel safe (Ofsted; 16) | 0 |
| Pupils attendance (Ofsted; 16) | 0 |
| The extent to which pupils contribute to the school and wider community (Ofsted; 16) | 0 |
| The extent to which pupils develop workplace and other skills (Ofsted; 16) | -0.02 |
| The extent to which the curriculum meets pupils needs (Ofsted; 16) | 0 |
| The effectiveness of care guidance and support (Ofsted; 16) | 0 |
| The effectiveness with which the school promotes equality of opportunity (Ofsted; 16) | 0 |
| The effectiveness with which the school deploys resources to achieve value (Ofsted; 16) | 0 |
| The effectiveness of the governing body in challenging and supporting (Ofsted; 16) | 0.01 |
| Authorised Absence (%) 12 | 0.02 |
| Unauthorised Absence (%) 12 | 0 |
| Overall Absence (%) 12 | 0.01 |
| School level Authorised Absence (%) 12 | 0 |
| School level Unauthorised Absence (%) 12 | 0 |
| School level Overall Absence (%) 12 | 0.001 |
| School level Persistent Absentees (%) 12 | 0 |
| Pupil Teacher Ratio age 12 | 0 |
| Pupils Taking FSM (%) 12 | 0.08 |
| Pupils FSM Eligible (%) 12 | 0 |
| Pupils SEN Statemented (%) 12 | 0.05 |
| Pupils SEN No Statement (%) 12 | -0.03 |
| Pupil WBRI Pupils (White British or Irish) (%) 12 | 0 |
| Pupils First Language is English (%) 12 | -0.001 |
| Pupils Language is Not English (%) 12 | 0 |
| Headcount 12 | 0 |
| Boys Headcount 12 | 0 |
| Girls Headcount 12 | 0 |
| Overall effectiveness (Ofsted; 12) | 0 |
| Pupils’ achievement (aggregated) (Ofsted; 12) | 0 |
| Behaviour and safety of pupils (Ofsted; 12) | 0 |
| Quality of teaching (Ofsted; 12) | 0 |
| Leadership and management (Ofsted; 12) | 0 |
| Effectiveness of partnerships in promoting learning and wellbeing (Ofsted;12) | 0 |
| The quality of pupils learning and their progress (Ofsted; 12) | 0 |
| The quality of learning for pupils with special educational needs and or disability (Ofsted; 12) | 0 |
| The extent of pupils spiritual moral social and cultural development (Ofsted; 12) | 0 |
| The extent to which pupils adopt healthy lifestyles (Ofsted; 12) | 0 |
| The extent to which pupils feel safe (Ofsted; 12) | 0 |
| Pupils’ attendance (Ofsted; 12) | 0 |
| The extent to which pupils contribute to the school and wider community (Ofsted; 12) | 0 |
| The extent to which pupils develop workplace and other skills (Ofsted;12) | 0 |
| The extent to which the curriculum meets pupils needs (Ofsted; 12) | 0 |
| The effectiveness of care guidance and support (Ofsted; 12) | 0 |
| The effectiveness with which the school promotes equality of opportunity (Ofsted; 12) | 0 |
| The effectiveness with which the school deploys resources to achieve value (Ofsted; 12) | 0 |
| The effectiveness of the governing body in challenging and supporting (Ofsted; 12) | 0 |

| Variance in P-factor at age 21 explained by objective school environment measures at ages 12 and 16 | | | | |
| --- | --- | --- | --- | --- |
| R2 | alpha | lambda | N (training set) | N (test set) |
| 0.033 | 0.7 | 0.023 | 2074 | 516 |

### Supplementary Table 14: Standardised estimates for cross-lagged analyses of the general factor of psychopathology at 12 and 16 and individual absences at 12 and 16, adjusted for 27 adult psychiatric polygenic scores

| Pathways | Standardised path estimates | Lower 95% CI | Upper 95% CI |
| --- | --- | --- | --- |
| Stability pathway  P-factor at 12 --> P-factor at 16 | 0.63 | 0.61 | 0.65 |
| Cross-lagged pathway  P-factor at 12 --> Individual Absence at 16 | 0.02 | -0.01 | 0.04 |
| Cross-lagged pathway  Individual Absence at 12--> P-factor at 16 | 0.02 | -0.0009 | 0.05 |
| Stability pathway  Individual Absence at 12 --> Individual Absence at 16 | 0.14 | 0.11 | 0.16 |
| Contemporaneous pathway  P-factor at 12 <->  Individual Absence 12 | 0.03 | -0.0007 | 0.06 |
| Contemporaneous residual pathway  P-factor at 16 <-> Individual Absence at 16 | 0.01 | -0.01 | 0.04 |

### Supplementary Table 15: Standardised estimates for cross-lagged analyses of the general factor of psychopathology at 12 and 16 and pupil community characteristics at 12 and 16, adjusted for 27 adult psychiatric polygenic scores

| Pathways | Standardised path estimates | Lower 95% CI | Upper 95% CI |
| --- | --- | --- | --- |
| Stability pathway  P-factor at 12 --> P-factor at 16 | 0.63 | 0.61 | 0.65 |
| Cross-lagged pathway  P-factor at 12 --> Pupil community characteristics at 16 | 0.02 | 0.001 | 0.03 |
| Cross-lagged pathway  Pupil community characteristics at 12 --> P-factor at 16 | 0.03 | 0.005 | 0.05 |
| Stability pathway  Pupil community characteristics at 12 --> Pupil community characteristics at 16 | 0.87 | 0.86 | 0.88 |
| Contemporaneous pathway  P-factor at 12 <-> Pupil community characteristics at 12 | 0.09 | 0.07 | 0.12 |
| Contemporaneous residual pathway  P-factor at 16 <-> Pupil community characteristics at 16 | 0.002 | -0.01 | 0.01 |

### Supplementary Table 16: Standardised estimates for cross-lagged analyses of the general factor of psychopathology at 12 and 16 and pupil community characteristics at 12 and 16, adjusted for 27 adult psychiatric polygenic scores and socioeconomic status

| Pathways | Standardised path estimates | Lower 95% CI | Upper 95% CI |
| --- | --- | --- | --- |
| Stability pathway  P-factor at 12 --> P-factor at 16 | 0.63 | 0.62 | 0.65 |
| Cross-lagged pathway  P-factor at 12 --> Pupil community characteristics at 16 | 0.007 | -0.007 | 0.02 |
| Cross-lagged pathway  Pupil community characteristics at 12 --> P-factor at 16 | 0.02 | -0.005 | 0.04 |
| Stability pathway  Pupil community characteristics at 12 --> Pupil community characteristics at 16 | 0.86 | 0.85 | 0.87 |
| Contemporaneous pathway  P-factor at 12 <-> Pupil community characteristics at 12 | 0.06 | 0.03 | 0.08 |
| Contemporaneous residual pathway  P-factor at 16 <-> Pupil community characteristics at 16 | -0.001 | -0.01 | 0.01 |

### Supplementary Table 17: Standardised estimates for cross-lagged analyses of the general factor of psychopathology at 12 and 16 and school-level characteristics at 12 and 16, adjusted for 27 adult psychiatric polygenic scores

| Pathways | Standardised path estimates | Lower 95% CI | Upper 95% CI |
| --- | --- | --- | --- |
| Stability pathway  P-factor at 12 --> P-factor at 16 | 0.63 | 0.61 | 0.65 |
| Cross-lagged pathway  P-factor at 12 --> School level characteristics at 16 | 0.02 | -0.004 | 0.04 |
| Cross-lagged pathway  School level characteristics at 12--> P-factor at 16 | 0.05 | 0.02 | 0.07 |
| Stability pathway  School level characteristics at 12--> School level characteristics at 16 | 0.74 | 0.72 | 0.75 |
| Contemporaneous pathway  P-factor at 12 <-> School level characteristics at 12 | 0.10 | 0.06 | 0.13 |
| Contemporaneous residual correlation  P-factor at 16 <-> School level characteristics at 16 | 0.01 | -0.009 | 0.03 |

### Supplementary Table 18: Standardised estimates for cross-lagged analyses of the general factor of psychopathology at 12 and 16 and school-level characteristics at 12 and 16, adjusted for 27 adult psychiatric polygenic scores and socioeconomic status

| Pathways | Standardised path estimates | Lower 95% CI | Upper 95% CI |
| --- | --- | --- | --- |
| Stability pathway  P-factor at 12 --> P-factor at 16 | 0.63 | 0.61 | 0.65 |
| Cross-lagged pathway  P-factor at 12 --> School level characteristics at 16 | 0.009 | -0.01 | 0.03 |
| Cross-lagged pathway  School level characteristics at 12--> P-factor at 16 | 0.04 | 0.01 | 0.07 |
| Stability pathway  School level characteristics at 12--> School level characteristics at 16 | 0.71 | 0.69 | 0.73 |
| Contemporaneous pathway  P-factor at 12 <-> School level characteristics at 12 | 0.06 | 0.03 | 0.09 |
| Contemporaneous residual correlation  P-factor at 16 <-> School level characteristics at 16 | 0.004 | -0.01 | 0.02 |

### Supplementary Table 19: Standardised estimates for cross-lagged analyses of the general factor of psychopathology at 12 and 16 and school-level characteristics at 12 and 16, adjusted for 27 adult psychiatric polygenic scores, SES and general factor of psychopathology at age 7

| Pathways | Standardised path estimates | Lower 95% CI | Upper 95% CI |
| --- | --- | --- | --- |
| Stability pathway  P-factor at 12 --> P-factor at 16 | 0.63 | 0.61 | 0.65 |
| Cross-lagged pathway  P-factor at 12 --> School level characteristics at 16 | 0.01 | -0.01 | 0.03 |
| Cross-lagged pathway  School level characteristics at 12--> P-factor at 16 | 0.04 | 0.006 | 0.07 |
| Stability pathway  School level characteristics at 12--> School level characteristics at 16 | 0.72 | 0.70 | 0.73 |
| Contemporaneous pathway  P-factor at 12 <-> School level characteristics at 12 | 0.04 | 0.002 | 0.07 |
| Contemporaneous residual correlation  P-factor at 16 <-> School level characteristics at 16 | 0.009 | -0.01 | 0.03 |

### Supplementary Table 20: Model fit indices of four cross-lagged models for individual absence, pupil community characteristics, school-level characteristics and headcount at 12 and 16 with the general factor of psychopathology (P-factor) at 12 and 16

| Model | AIC | BIC | CFI | RMSEA |
| --- | --- | --- | --- | --- |
| Individual absence | 53448.88 | 53499.02 | 1 | 0 |
| Pupil community characteristics | 45808.49 | 45858.63 | 1 | 0 |
| School-level characteristics | 47165.27 | 47215.41 | 1 | 0 |
| Headcount | 41207.59 | 41257.73 | 1 | 0 |

### Supplementary Table 21: Reduced (perceived school measures only) and full (perceived and administrative school measures) linear regression models across development (without factor analysis; robustness check)

| Variance in age 12 p-factor explained by subjective school environment variables at age 9 (reduced) and subjective school environment factors at 9 and objective school environment variables at 12 (full) | | |
| --- | --- | --- |
| Model | Adjusted R-squared |  |
| Reduced | 0.30 | Adjusted Delta R-squared:  0.04 |
| Full | 0.34 | Likelihood Ratio Test result:  X2 (33) = 2.161, p <0.001 |

| Variance in age 16 p-factor explained subjective school environment variables at age 16 (reduced) and subjective school environment factors at 16, and objective school environment variables at 16 (full) | | |
| --- | --- | --- |
| Model | Adjusted R-squared |  |
| Reduced | 0.21 | Adjusted Delta R-squared:  0.02 |
| Full | 0.23 | Likelihood Ratio Test result:  X2 (46) = 2.09, p <0.001 |
| Variance in age 21 p-factor explained subjective school environment variables at age 9 and 16 (reduced) and subjective school environment variables at 9 and 16, and objective school environment variables at 12 and 16 (full) | | |
| Model | Adjusted R-squared |  |
| Reduced | 0.19 | Adjusted Delta R-squared:  0.03 |
| Full | 0.22 | Likelihood Ratio Test result:  X2(46) = 1.33, p = 0.08 |

### Supplementary Table 22: List of all mental health measures at each age

| Age 7 | Rater | Reference |
| --- | --- | --- |
| SDQ prosocial | parent, teacher | [Goodman (1997)](https://acamh.onlinelibrary.wiley.com/doi/full/10.1111/jcpp.13113#jcpp13113-bib-0015) |
| SDQ hyperactivity | parent, teacher | [Goodman (1997)](https://acamh.onlinelibrary.wiley.com/doi/full/10.1111/jcpp.13113#jcpp13113-bib-0015) |
| SDQ conduct | parent, teacher | [Goodman (1997)](https://acamh.onlinelibrary.wiley.com/doi/full/10.1111/jcpp.13113#jcpp13113-bib-0015) |
| SDQ peer problems | parent, teacher | [Goodman (1997)](https://acamh.onlinelibrary.wiley.com/doi/full/10.1111/jcpp.13113#jcpp13113-bib-0015) |
| SDQ emotional problems | parent, teacher | [Goodman (1997)](https://acamh.onlinelibrary.wiley.com/doi/full/10.1111/jcpp.13113#jcpp13113-bib-0015) |
| Social (ASD) | parent, teacher | DSM-IV criteria items |
| Non-Social (ASD) | parent, teacher | DSM-IV criteria items |
| Age 9 |  |  |
| SDQ prosocial | parent, teacher, self | [Goodman (1997)](https://acamh.onlinelibrary.wiley.com/doi/full/10.1111/jcpp.13113#jcpp13113-bib-0015) |
| SDQ hyperactivity | parent, teacher, self | [Goodman (1997)](https://acamh.onlinelibrary.wiley.com/doi/full/10.1111/jcpp.13113#jcpp13113-bib-0015) |
| SDQ conduct | parent, teacher, self | [Goodman (1997)](https://acamh.onlinelibrary.wiley.com/doi/full/10.1111/jcpp.13113#jcpp13113-bib-0015) |
| SDQ peer problem | parent, teacher, self | [Goodman (1997)](https://acamh.onlinelibrary.wiley.com/doi/full/10.1111/jcpp.13113#jcpp13113-bib-0015) |
| SDQ emotion | parent, teacher, self | [Goodman (1997)](https://acamh.onlinelibrary.wiley.com/doi/full/10.1111/jcpp.13113#jcpp13113-bib-0015) |
| CAST social | parent, teacher, self | Scott et al. (2002) and Williams et al. (2005) |
| CAST non-social | parent, teacher, self | Scott et al. (2002) and Williams et al. (2005) |
| CAST communication | parent, teacher, self | Scott et al. (2002) and Williams et al. (2005) |
| APSD narcissism | parent, teacher | [Frick and Hare (2001)](https://acamh.onlinelibrary.wiley.com/doi/full/10.1111/jcpp.13113#jcpp13113-bib-0014) |
| APSD impulsivity | parent, teacher | [Frick and Hare (2001)](https://acamh.onlinelibrary.wiley.com/doi/full/10.1111/jcpp.13113#jcpp13113-bib-0014) |
| Age 12 |  |  |
| SDQ emotion | parent, teacher, self | [Goodman (1997)](https://acamh.onlinelibrary.wiley.com/doi/full/10.1111/jcpp.13113#jcpp13113-bib-0015) |
| SDQ behaviour problems | parent, teacher, self | [Goodman (1997)](https://acamh.onlinelibrary.wiley.com/doi/full/10.1111/jcpp.13113#jcpp13113-bib-0015) |
| Mood Feelings Questionnaire | parent, teacher | [Angold et al. (1995)](https://acamh.onlinelibrary.wiley.com/doi/full/10.1111/jcpp.13113#jcpp13113-bib-0001) |
| APSD (Anti-social personality disorder) overall scale | parent, teacher | [Frick and Hare (2001)](https://acamh.onlinelibrary.wiley.com/doi/full/10.1111/jcpp.13113#jcpp13113-bib-0014) |
| CAST overall scale | parent, teacher |  |
| Conners ADHD overall scale | parent | Conners C.K. (2003) |
| SDQ Prosocial | parent, teacher, self | [Goodman (1997)](https://acamh.onlinelibrary.wiley.com/doi/full/10.1111/jcpp.13113#jcpp13113-bib-0015) |
| SDQ Hyperactivity | parent, teacher, self | [Goodman (1997)](https://acamh.onlinelibrary.wiley.com/doi/full/10.1111/jcpp.13113#jcpp13113-bib-0015) |
| SDQ Conduct | parent, teacher, self | [Goodman (1997)](https://acamh.onlinelibrary.wiley.com/doi/full/10.1111/jcpp.13113#jcpp13113-bib-0015) |
| SDQ Peer Problems | parent, teacher, self | [Goodman (1997)](https://acamh.onlinelibrary.wiley.com/doi/full/10.1111/jcpp.13113#jcpp13113-bib-0015) |
| APSD Callous-Unemotional scale | parent, teacher | [Frick and Hare (2001)](https://acamh.onlinelibrary.wiley.com/doi/full/10.1111/jcpp.13113#jcpp13113-bib-0014) |
| APSD Narcissism scale | parent, teacher | [Frick and Hare (2001)](https://acamh.onlinelibrary.wiley.com/doi/full/10.1111/jcpp.13113#jcpp13113-bib-0014) |
| APSD Impulsivity scale | parent, teacher | [Frick and Hare (2001)](https://acamh.onlinelibrary.wiley.com/doi/full/10.1111/jcpp.13113#jcpp13113-bib-0014) |
| CAST Social scale | parent, teacher | Scott et al. (2002) and Williams et al. (2005) |
| CAST Non-Social scale | parent, teacher | Scott et al. (2002) and Williams et al. (2005) |
| CAST Communication scale | parent, teacher | Scott et al. (2002) and Williams et al. (2005) |
| Conners Hyperactivity-Impulsivity scale | parent | Conners C.K. (2003) |
| Conners Inattention scale | parent | Conners C.K. (2003) |
| Age 16 |  |  |
| SDQ hyperactivity | parent, self | [Goodman (1997)](https://acamh.onlinelibrary.wiley.com/doi/full/10.1111/jcpp.13113#jcpp13113-bib-0015) |
| SDQ conduct | parent, self | [Goodman (1997)](https://acamh.onlinelibrary.wiley.com/doi/full/10.1111/jcpp.13113#jcpp13113-bib-0015) |
| SDQ prosocial | parent, self | [Goodman (1997)](https://acamh.onlinelibrary.wiley.com/doi/full/10.1111/jcpp.13113#jcpp13113-bib-0015) |
| SDQ emotion | self | [Goodman (1997)](https://acamh.onlinelibrary.wiley.com/doi/full/10.1111/jcpp.13113#jcpp13113-bib-0015) |
| SDQ peer problems | self | [Goodman (1997)](https://acamh.onlinelibrary.wiley.com/doi/full/10.1111/jcpp.13113#jcpp13113-bib-0015) |
| MFQ total | parent, self | [Angold et al. (1995)](https://acamh.onlinelibrary.wiley.com/doi/full/10.1111/jcpp.13113#jcpp13113-bib-0001) |
| ARBQ anxiety | parent | Eley, T.C., Bolton, D., O’Connor, T.G., Perrin, S., Smith, P. and Plomin, R. (2003). |
| Conners Impulsivity | parent | Conners C.K. (2003) |
| Conners inattention | parent | Conners C.K. (2003) |
| Conners emotional lability | parent | Conners C.K. (2003) |
| ICUT callous | parent, self | [Kimonis et al. (2008)](https://acamh.onlinelibrary.wiley.com/doi/full/10.1111/jcpp.13113#jcpp13113-bib-0024) |
| ICUT unemotional | parent, self | [Kimonis et al. (2008)](https://acamh.onlinelibrary.wiley.com/doi/full/10.1111/jcpp.13113#jcpp13113-bib-0024) |
| ICUT uncaring | parent, self | [Kimonis et al. (2008)](https://acamh.onlinelibrary.wiley.com/doi/full/10.1111/jcpp.13113#jcpp13113-bib-0024) |
| Autism social | parent | [Baron-Cohen et al. (2001)](https://acamh.onlinelibrary.wiley.com/doi/full/10.1111/jcpp.13113#jcpp13113-bib-0002) |
| Autism attention switching | parent | [Baron-Cohen et al. (2001)](https://acamh.onlinelibrary.wiley.com/doi/full/10.1111/jcpp.13113#jcpp13113-bib-0002) |
| Autism imagination | parent, self | [Baron-Cohen et al. (2001)](https://acamh.onlinelibrary.wiley.com/doi/full/10.1111/jcpp.13113#jcpp13113-bib-0002) |
| Autism detail attention | parent, self | [Baron-Cohen et al. (2001)](https://acamh.onlinelibrary.wiley.com/doi/full/10.1111/jcpp.13113#jcpp13113-bib-0002) |
| Subjective happiness | self | Lyubomirsky, S., and Lepper, H. S. (1999) |
| CASI anxiety | self | Silverman WK, Fleisig W, Rabian B, Peterson RA. (1991) |
| SWAN inattention | self | Swanson, J., Schuck, S., Mann, M., Carlson, C., Hartman, K., Sergeant, J. et al (2005) |
| SWAN hyperactivity | self | Swanson, J., Schuck, S., Mann, M., Carlson, C., Hartman, K., Sergeant, J. et al (2005) |
| Age 21 | | |
| SDQ emotion | parent, self | [Goodman (1997)](https://acamh.onlinelibrary.wiley.com/doi/full/10.1111/jcpp.13113#jcpp13113-bib-0015) |
| SDQ conduct | parent, self | [Goodman (1997)](https://acamh.onlinelibrary.wiley.com/doi/full/10.1111/jcpp.13113#jcpp13113-bib-0015) |
| SDQ hyperactivity | parent, self | [Goodman (1997)](https://acamh.onlinelibrary.wiley.com/doi/full/10.1111/jcpp.13113#jcpp13113-bib-0015) |
| SDQ peer problems | parent, self | [Goodman (1997)](https://acamh.onlinelibrary.wiley.com/doi/full/10.1111/jcpp.13113#jcpp13113-bib-0015) |
| SDQ prosocial | parent, self | [Goodman (1997)](https://acamh.onlinelibrary.wiley.com/doi/full/10.1111/jcpp.13113#jcpp13113-bib-0015) |
| Conners impulsivity | parent | Conners C.K. (2003) |
| Conners Inattention | parent | Conners C.K. (2003) |
| MFQ total | self | [Angold et al. (1995)](https://acamh.onlinelibrary.wiley.com/doi/full/10.1111/jcpp.13113#jcpp13113-bib-0001) |
| General anxiety | self | Craske M, Wittchen U, Bogels S, Stein M, Andrews G, Lebeu R. (2013). |
| BAQ physical aggression | self | Webster, G. D., DeWall, C. N., Pond Jr, R. S., Deckman, T., Jonason, P. K., Le, B. M., ... & Smith, C. V. (2014) |
| BAQ verbal aggression | self | Webster, G. D., DeWall, C. N., Pond Jr, R. S., Deckman, T., Jonason, P. K., Le, B. M., ... & Smith, C. V. (2014) |
| BAQ anger | self | Webster, G. D., DeWall, C. N., Pond Jr, R. S., Deckman, T., Jonason, P. K., Le, B. M., ... & Smith, C. V. (2014) |
| SANS total | self | Ronald, A., Sieradzka, D., Cardno, A. G., Haworth, C. M. A, McGuire, P., Freeman, D. (2014) |
| SPEQ paranoia | self | Ronald, A., Sieradzka, D., Cardno, A. G., Haworth, C. M. A, McGuire, P., Freeman, D. (2014) |
| SPEQ hallucinations | self | Ronald, A., Sieradzka, D., Cardno, A. G., Haworth, C. M. A, McGuire, P., Freeman, D. (2014) |

### Supplementary Table 23: Full list of school-level administrative measures

| Age 12 | Source |
| --- | --- |
| Individual authorised absence (percentage) | National Pupil database, UK Office for National Statistics |
| Individual unauthorised absence (percentage) | National Pupil database, UK Office for National Statistics |
| Overall absence (percentage) | National Pupil database, UK Office for National Statistics |
| School level authorised absence (percentage) | National Pupil database, UK Office for National Statistics |
| School level unauthorised absence (percentage) | National Pupil database, UK Office for National Statistics |
| School level overall absence (percentage) | National Pupil database, UK Office for National Statistics |
| School level persistent absentees (percentage) | National Pupil database, UK Office for National Statistics |
| Pupil teacher ratio | National Pupil database, UK Office for National Statistics |
| Pupils taking free school meals (percentage) | National Pupil database, UK Office for National Statistics |
| Pupils eligible for free school meals (percentage) | National Pupil database, UK Office for National Statistics |
| Pupils with a SEN statement (percentage) | National Pupil database, UK Office for National Statistics |
| Pupils with SEN but no statement (percentage) | National Pupil database, UK Office for National Statistics |
| Pupils of white British or Irish ethnicity (percentage) | National Pupil database, UK Office for National Statistics |
| Pupils whose first language is English (percentage) | National Pupil database, UK Office for National Statistics |
| Pupils whose first language is not English (percentage) | National Pupil database, UK Office for National Statistics |
| Headcount | National Pupil database, UK Office for National Statistics |
| Boys headcount | National Pupil database, UK Office for National Statistics |
| Girls headcount | National Pupil database, UK Office for National Statistics |
| Overall effectiveness | Ofsted rating, Department for Education |
| Pupils’ Achievement | Ofsted rating, Department for Education |
| Behaviour and safety of pupils | Ofsted rating, Department for Education |
| Quality of teaching | Ofsted rating, Department for Education |
| Leadership and management | Ofsted rating, Department for Education |
| Effectiveness of partnerships in promoting learning | Ofsted rating, Department for Education |
| Quality of pupils’ learning and progress | Ofsted rating, Department for Education |
| Pupils’ spiritual, moral and cultural development | Ofsted rating, Department for Education |
| The extent to which pupils adopt healthy lifestyles | Ofsted rating, Department for Education |
| The extent to which pupils feel safe | Ofsted rating, Department for Education |
| Pupils’ attendance | Ofsted rating, Department for Education |
| The extent to which pupils contribute to the school and wider community | Ofsted rating, Department for Education |
| The extent to which pupils develop workplace relevant skills | Ofsted rating, Department for Education |
| The extent to which the curriculum meets pupils’ needs | Ofsted rating, Department for Education |
| The effectiveness of care, guidance and support | Ofsted rating, Department for Education |
| Equality, diversity and inclusion | Ofsted rating, Department for Education |
| The effectiveness with which the school deploys resources for maximum value | Ofsted rating, Department for Education |
| The effectiveness of the governing body | Ofsted rating, Department for Education |
| Age 16 | Source |
| Individual authorised absence (percentage) | National Pupil database, UK Office for National Statistics |
| Individual unauthorised absence (percentage) | National Pupil database, UK Office for National Statistics |
| Overall absence (percentage) | National Pupil database, UK Office for National Statistics |
| School level authorised absence (percentage) | National Pupil database, UK Office for National Statistics |
| School level unauthorised absence (percentage) | National Pupil database, UK Office for National Statistics |
| School level overall absence (percentage) | National Pupil database, UK Office for National Statistics |
| School level persistent absentees (percentage) | National Pupil database, UK Office for National Statistics |
| Pupil teacher ratio | National Pupil database, UK Office for National Statistics |
| Pupils taking free school meals (percentage) | National Pupil database, UK Office for National Statistics |
| Pupils eligible for free school meals (percentage) | National Pupil database, UK Office for National Statistics |
| Pupils with a SEN statement (percentage) | National Pupil database, UK Office for National Statistics |
| Pupils with SEN but no statement (percentage) | National Pupil database, UK Office for National Statistics |
| Pupils of white British or Irish ethnicity (percentage) | National Pupil database, UK Office for National Statistics |
| Pupils whose first language is English (percentage) | National Pupil database, UK Office for National Statistics |
| Pupils whose first language is not English (percentage) | National Pupil database, UK Office for National Statistics |
| Headcount | National Pupil database, UK Office for National Statistics |
| Boys headcount | National Pupil database, UK Office for National Statistics |
| Girls headcount | National Pupil database, UK Office for National Statistics |
| Overall effectiveness | Ofsted rating, Department for Education |
| Pupils’ Achievement | Ofsted rating, Department for Education |
| Behaviour and safety of pupils | Ofsted rating, Department for Education |
| Quality of teaching | Ofsted rating, Department for Education |
| Leadership and management | Ofsted rating, Department for Education |
| Effectiveness of partnerships in promoting learning | Ofsted rating, Department for Education |
| Quality of pupils’ learning and progress | Ofsted rating, Department for Education |
| Pupils’ spiritual, moral and cultural development | Ofsted rating, Department for Education |
| The extent to which pupils adopt healthy lifestyles | Ofsted rating, Department for Education |
| The extent to which pupils feel safe | Ofsted rating, Department for Education |
| Pupils’ attendance | Ofsted rating, Department for Education |
| The extent to which pupils contribute to the school and wider community | Ofsted rating, Department for Education |
| The extent to which pupils develop workplace relevant skills | Ofsted rating, Department for Education |
| The extent to which the curriculum meets pupils’ needs | Ofsted rating, Department for Education |
| The effectiveness of care, guidance and support | Ofsted rating, Department for Education |
| Equality, diversity and inclusion | Ofsted rating, Department for Education |
| The effectiveness with which the school deploys resources for maximum value | Ofsted rating, Department for Education |
| The effectiveness of the governing body | Ofsted rating, Department for Education |

### Supplementary Table 24: Eigenvalues and standardised factor loadings greater than +/- 0.30 for exploratory factor analysis (EFA; using oblimin rotation) of school-level administrative measures at age 16

| Eigenvalues | | | | | | | | | |
| --- | --- | --- | --- | --- | --- | --- | --- | --- | --- |
| [1] | 1.76E+01 | 3.70E+00 | 3.15E+00 | 2.32E+00 | 1.91E+00 | 1.04E+00 | 1.00E+00 | 1.00E+00 | 7.86E-01 |
| [10] | 6.83E-01 | 5.98E-01 | 5.46E-01 | 4.99E-01 | 4.18E-01 | 3.37E-01 | 3.16E-01 | 2.60E-01 | 2.41E-01 |
| [19] | 2.31E-01 | 2.06E-01 | 1.73E-01 | 1.40E-01 | 1.20E-01 | 9.86E-02 | 8.29E-02 | 7.62E-02 | 7.16E-02 |
| [28] | 4.97E-02 | 4.41E-02 | 3.83E-02 | 3.17E-02 | 2.97E-02 | 1.04E-02 | 8.49E-03 | 7.64E-03 | 2.98E-03 |
| [37] | 1.96E-03 | 4.86E-17 |  |  |  |  |  |  |  |

| Standardised factor loadings |  |  |  |  |  |
| --- | --- | --- | --- | --- | --- |
|  | MR1 | MR2 | MR3 | MR4 | MR5 |
| Authorised Absence (%) |  |  | -0.48 | 0.72 |  |
| Unauthorised Absence (%) |  |  |  | 0.35 |  |
| Overall Absence (%) |  |  | -0.52 | 0.82 |  |
| School level Authorised Absence (%) | 0.34 |  |  |  |  |
| School level Unauthorised Absence (%) | 0.67 | 0.37 |  |  |  |
| School level Overall Absence (%) | 0.75 |  | -0.33 |  | 0.37 |
| School level Persistent Absentees (%) | 0.70 |  |  |  | 0.42 |
| Pupil Teacher Ratio |  |  |  |  |  |
| Pupils Taking FSM (%) | 0.66 | 0.58 |  |  |  |
| Pupils FSM Eligible (%) | 0.66 | 0.61 |  |  |  |
| Pupils SEN Statemented (%) |  | 0.47 |  |  |  |
| Pupils SEN No Statement (%) | 0.67 | 0.46 |  |  |  |
| Pupil WBRI Pupils (White British or Irish) (%) |  | 0.47 | 0.61 | 0.30 |  |
| Pupils First Language is English (%) |  | 0.60 | 0.51 | 0.30 |  |
| Pupils Language is Not English (%) |  | 0.61 | 0.63 |  |  |
| Headcount | -0.35 |  | 0.55 | 0.30 | 0.66 |
| Boys Headcount |  |  | 0.40 |  | 0.51 |
| Girls Headcount | -0.33 | -0.39 | 0.40 |  | 0.37 |
| Overall effectiveness (Ofsted) | 0.92 |  |  |  |  |
| Pupils achievement (aggregated) (Ofsted) | 0.92 |  |  |  |  |
| Behaviour and safety of pupils (Ofsted) | 0.83 |  |  |  |  |
| Quality of teaching (Ofsted) | 0.91 |  |  |  |  |
| Leadership and management (Ofsted) | 0.86 |  |  |  |  |
| Effectiveness of partnerships in promoting learning and wellbeing (Ofsted) | 0.79 |  |  |  |  |
| The quality of pupils learning and their progress (Ofsted) | 0.91 |  |  |  |  |
| The quality of learning for pupils with special educational needs and or disability (Ofsted) | 0.91 |  |  |  |  |
| The extent of pupils spiritual moral social and cultural development (Ofsted) | 0.84 |  |  |  |  |
| The extent to which pupils adopt healthy lifestyles (Ofsted) | 0.83 |  |  |  |  |
| The extent to which pupils feel safe (Ofsted) | 0.77 |  |  |  |  |
| Pupils attendance (Ofsted) | 0.77 |  |  |  |  |
| The extent to which pupils contribute to the school and wider community (Ofsted) | 0.74 |  |  |  |  |
| The extent to which pupils develop workplace and other skills (Ofsted) | 0.90 |  |  |  |  |
| The extent to which the curriculum meets pupils needs (Ofsted) | 0.81 |  |  |  |  |
| The effectiveness of care guidance and support (Ofsted) | 0.79 |  |  |  |  |
| The effectiveness with which the school promotes equality of opportunity (Ofsted) | 0.80 | -0.35 |  |  |  |
| The effectiveness with which the school deploys resources to achieve value (Ofsted) | 0.89 |  |  |  |  |
| The effectiveness of the governing body in challenging and supporting (Ofsted) | 0.77 |  |  |  |  |

### Supplementary Table 25: Factor loadings and model fit statistics for confirmatory factor analyses (CFA) of school-level administrative measures at ages 12 and 16

| Age 12 | |  |  |  |
| --- | --- | --- | --- | --- |
| Latent Variables: | |  |  |  |
|  | Estimate | Std.Err | z-value | P(>|z|) |
| **Individual Absence** |  |  |  |  |
| Authorised Absence (%) | 0.94 | 0.03 | 35.35 | 0 |
| Overall Absence (%) | 0.95 | 0.03 | 36.21 | 0 |
| Unauthorised Absence (%) | 0.39 | 0.02 | 22.06 | 0 |
| **Headcount** | |  |  |  |
| Total Headcount | 0.70 | 0.03 | 21.28 | 0 |
| Boys Headcount | 0.56 | 0.03 | 18.13 | 0 |
| Girls Headcount | 0.47 | 0.03 | 17.89 | 0 |
| **Pupil Community Characteristics** |  |  |  |  |
| Pupils Taking FSM (%) | 0.81 | 0.01 | 86.73 | 0 |
| Pupils FSM Eligible (%) | 0.74 | 0.01 | 92.08 | 0 |
| Pupils SEN Statemented (%) | 0.51 | 0.01 | 38.13 | 0 |
| Pupils SEN No Statement (%) | 0.59 | 0.01 | 45.08 | 0 |
| Pupil WBRI Pupils (White British or Irish) (%) | 0.57 | 0.02 | 43.6 | 0 |
| Pupils First Language is English (%) | 0.46 | 0.02 | 30.8 | 0 |
| Pupils Language is Not English (%) | 0.31 | 0.02 | 20.95 | 0 |
| **School level characteristics** |  |  |  |  |
| School level Authorised Absence (%) | 0.22 | 0.02 | 12.89 | 0 |
| School level Unauthorised Absence (%) | 0.51 | 0.02 | 31.09 | 0 |
| School level Overall Absence (%) | 0.47 | 0.02 | 28.16 | 0 |
| School level Persistent Absentees (%) | 0.51 | 0.02 | 30.94 | 0 |
| Overall effectiveness (Ofsted) | 0.98 | 0.01 | 95.96 | 0 |
| Pupils achievement (Ofsted) | 0.97 | 0.01 | 95.15 | 0 |
| Behaviour and safety of pupils (Ofsted) | 0.77 | 0.01 | 65.22 | 0 |
| Quality of teaching (Ofsted) | 0.92 | 0.01 | 85.57 | 0 |
| Leadership and management (Ofsted) | 0.91 | 0.01 | 84.70 | 0 |
| Effectiveness of partnerships in promoting learning and wellbeing (Ofsted) | 0.75 | 0.01 | 62.17 | 0 |
| The quality of pupils learning and their progress (Ofsted) | 0.98 | 0.01 | 93.98 | 0 |
| The quality of learning for pupils with special educational needs and or disability (Ofsted) | 0.89 | 0.01 | 79.60 | 0 |
| The extent of pupils spiritual moral social and cultural development (Ofsted) | 0.77 | 0.01 | 64.23 | 0 |
| The extent to which pupils adopt healthy lifestyles (Ofsted) | 0.66 | 0.01 | 51.93 | 0 |
| The extent to which pupils feel safe (Ofsted) | 0.76 | 0.01 | 62.76 | 0 |
| Pupils attendance (Ofsted) | 0.62 | 0.01 | 48.50 | 0 |
| The extent to which pupils contribute to the school and wider community (Ofsted) | 0.70 | 0.01 | 56.18 | 0 |
| The extent to which pupils develop workplace and other skills (Ofsted) | 0.80 | 0.01 | 67.25 | 0 |
| The extent to which the curriculum meets pupils needs (Ofsted) | 0.75 | 0.01 | 62.25 | 0 |
| The effectiveness of care guidance and support (Ofsted) | 0.81 | 0.01 | 68.89 | 0 |
| The effectiveness with which the school promotes equality of opportunity (Ofsted) | 0.88 | 0.01 | 78.69 | 0 |
| The effectiveness with which the school deploys resources to achieve value (Ofsted) | 0.94 | 0.01 | 86.60 | 0 |
| The effectiveness of the governing body in challenging and supporting (Ofsted) | 0.78 | 0.01 | 65.56 | 0 |
|  |  |  |  |  |
| Model fit: |  |  |  |  |
| AIC | 338699.95 |  |  |  |
| BIC | 339422.11 |  |  |  |
| CFI | 0.89 |  |  |  |
| TLI | 0.88 |  |  |  |
| RMSEA | 0.08 (0.07-0.09) |  |  |  |

| Age 16 | |  |  |  |
| --- | --- | --- | --- | --- |
| Latent Variables: | |  |  |  |
|  | Estimate | Std.Err | z-value | P(>|z|) |
| **Individual Absences** |  |  |  |  |
| Overall Absence (%) | 0.94 | 0.02 | 62.71 | 0 |
| Authorised Absence (%) | 0.67 | 0.01 | 41.38 | 0 |
| Unauthorised Absence (%) | 0.33 | 0.01 | 23.01 | 0 |
| **Headcount** | |  |  |  |
| Headcount | 0.92 | 0.06 | 68.40 | 0 |
| Boys Headcount | 0.63 | 0.03 | 47.53 | 0 |
| Girls Headcount | 0.58 | 0.03 | 55.16 | 0 |
|  |  |  |  |  |
| **Pupil community characteristics** |  |  |  |  |
| Pupils Taking FSM (%) | 0.98 | 0.01 | 95.98 | 0 |
| Pupils FSM Eligible (%) | 0.90 | 0.01 | 91.19 | 0 |
| Pupils SEN Statemented (%) | 0.27 | 0.01 | 20.18 | 0 |
| Pupils SEN No Statement (%) | 0.38 | 0.01 | 28.69 | 0 |
| Pupil WBRI Pupils (White British or Irish) (%) | 0.33 | 0.01 | 23.71 | 0 |
| Pupils First Language is English (%) | 0.31 | 0.01 | 22.28 | 0 |
| Pupils Language is Not English (%) | 0.32 | 0.01 | 23.91 | 0 |
| **School level Characteristics** |  |  |  |  |
| School level Authorised Absence (%) | 0.18 | 0.01 | 12.98 | 0 |
| School level Unauthorised Absence (%) | 0.51 | 0.01 | 37.09 | 0 |
| School level Overall Absence (%) | 0.45 | 0.01 | 32.31 | 0 |
| School level Persistent Absentees (%) | 0.50 | 0.02 | 19.24 | 0 |
| Overall effectiveness (Ofsted) | 0.98 | 0.01 | 95.97 | 0 |
| Pupils achievement (Ofsted) | 0.98 | 0.01 | 95.21 | 0 |
| Behaviour and safety of pupils (Ofsted) | 0.77 | 0.01 | 65.20 | 0 |
| Quality of teaching (Ofsted) | 0.92 | 0.01 | 85.63 | 0 |
| Leadership and management (Ofsted) | 0.91 | 0.01 | 84.61 | 0 |
| Effectiveness of partnerships in promoting learning and wellbeing (Ofsted) | 0.76 | 0.01 | 62.12 | 0 |
| The quality of pupils learning and their progress (Ofsted) | 0.98 | 0.01 | 94.03 | 0 |
| The quality of learning for pupils with special educational needs and or disability (Ofsted) | 0.89 | 0.01 | 79.59 | 0 |
| The extent of pupils spiritual moral social and cultural development (Ofsted) | 0.77 | 0.01 | 64.19 | 0 |
| The extent to which pupils adopt healthy lifestyles (Ofsted) | 0.66 | 0.01 | 51.9 | 0 |
| The extent to which pupils feel safe (Ofsted) | 0.76 | 0.01 | 62.71 | 0 |
| Pupils attendance (Ofsted) | 0.62 | 0.01 | 48.48 | 0 |
| The extent to which pupils contribute to the school and wider community (Ofsted) | 0.7 | 0.01 | 56.15 | 0 |
| The extent to which pupils develop workplace and other skills (Ofsted) | 0.80 | 0.01 | 67.26 | 0 |
| The extent to which the curriculum meets pupils needs (Ofsted) | 0.76 | 0.01 | 62.24 | 0 |
| The effectiveness of care guidance and support (Ofsted) | 0.81 | 0.01 | 68.82 | 0 |
| The effectiveness with which the school promotes equality of opportunity (Ofsted) | 0.89 | 0.01 | 78.61 | 0 |
| The effectiveness with which the school deploys resources to achieve value (Ofsted) | 0.94 | 0.01 | 86.56 | 0 |
| The effectiveness of the governing body in challenging and supporting (Ofsted) | 0.78 | 0.01 | 65.51 | 0 |
|  |  |  |  |  |
| Model fit: |  |  |  |  |
| AIC | 363964.74 |  |  |  |
| BIC | 364707.01 |  |  |  |
| CFI | 0.95 |  |  |  |
| TLI | 0.94 |  |  |  |
| RMSEA | 0.06 (0.05 – 0.07) |  |  |  |

### Supplementary Table 26: Full list of subjective school environment measures

| Age 9 Subjective school environment measures | | |
| --- | --- | --- |
| Measure | Rater/s | Reference |
| CEQ Friends/Peer Context | parent, teacher, self | Ainley, J. & Bourke, S. (1992) |
| CEQ Classroom Satisfaction | parent, teacher, self | Ainley, J. & Bourke, S. (1992) |
| CEQ Teachers | parent, self | Ainley, J. & Bourke, S. (1992) |
| CEQ Negative Affect | parent, self | Ainley, J. & Bourke, S. (1992) |
| CEQ Adventure | parent, self | Ainley, J. & Bourke, S. (1992) |
| CEQ Opportunity | parent, self | Ainley, J. & Bourke, S. (1992) |
| CEQ Acceptance | parent, self | Ainley, J. & Bourke, S. (1992) |
| Homework: nights per week | teacher | TEDS researchers |
| Homework: usually finishes | teacher | TEDS researchers |
| Homework: involves others | teacher | TEDS researchers |

| Age 16 Subjective school environment measures | | |
| --- | --- | --- |
| Measure | Rater/s | Reference |
| School Engagement: Teacher-Student Relations | self | Appleton et al. (2006) |
| School Engagement: Control/Relevance of School Work | self | Appleton et al. (2006) |
| School Engagement: Peer Support for Learning | self | Appleton et al. (2006) |
| School Engagement: Future Aspirations/Goals | self | Appleton et al. (2006) |
| PISA Homework Behaviour scale (child) | self | [PISA (OECD Programme for International Student Assessment): www.pisa.oecd.org. TEDS measures were selected from the PISA 2000, 2003 and 2006 student questionnaires](http://www.pisa.oecd.org/) |
| PISA Homework Feedback scale (child) | self | [PISA (OECD Programme for International Student Assessment): www.pisa.oecd.org. TEDS measures were selected from the PISA 2000, 2003 and 2006 student questionnaires](http://www.pisa.oecd.org/) |
| PISA Attitudes to School overall mean score (child) | self | [PISA (OECD Programme for International Student Assessment): www.pisa.oecd.org. TEDS measures were selected from the PISA 2000, 2003 and 2006 student questionnaires](http://www.pisa.oecd.org/) |
| PISA Maths Interest overall | self | [PISA (OECD Programme for International Student Assessment): www.pisa.oecd.org. TEDS measures were selected from the PISA 2000, 2003 and 2006 student questionnaires](http://www.pisa.oecd.org/) |
| PISA Time Spent on Maths total | self | [PISA (OECD Programme for International Student Assessment): www.pisa.oecd.org. TEDS measures were selected from the PISA 2000, 2003 and 2006 student questionnaires](http://www.pisa.oecd.org/) |
| EWQB Classroom Environment, work in small groups | self | Midgley, Eccles and Feldlaufer (1991). |
| EWQB Classroom Environment , help each other | self | Midgley, Eccles and Feldlaufer (1991). |
| EWQB Classroom Environment, first to answer | self | Midgley, Eccles and Feldlaufer (1991). |
| EWQB Classroom Environment, first to finish | self | Midgley, Eccles and Feldlaufer (1991). |
| EWQB Classroom Environment, show each other work | self | Midgley, Eccles and Feldlaufer (1991). |
| EWQB Classroom Environment, tell each other reports | self | Midgley, Eccles and Feldlaufer (1991). |
| EWQB Classroom Environment, makes work interesting | self | Midgley, Eccles and Feldlaufer (1991). |
| EWQB Classroom Environment, teacher likes work | self | Midgley, Eccles and Feldlaufer (1991). |
| EWQB Classroom Environment, teacher explains why | self | Midgley, Eccles and Feldlaufer (1991). |
| EWQB Classroom Environment, wait a long time | self | Midgley, Eccles and Feldlaufer (1991). |
| EWQB Classroom Environment, shows an interest | self | Midgley, Eccles and Feldlaufer (1991). |
| EWQB Classroom Environment, express opinions | self | Midgley, Eccles and Feldlaufer (1991). |
| EWQB Classroom Environment, continues teaching | self | Midgley, Eccles and Feldlaufer (1991). |
| EWQB Classroom Environment, does a lot to help | self | Midgley, Eccles and Feldlaufer (1991). |
| EWQB Classroom Environment, checks homework | self | Midgley, Eccles and Feldlaufer (1991). |
| EWQB Classroom Environment, cannot work well | self | Midgley, Eccles and Feldlaufer (1991). |
| WQB Classroom Environment, do not listen | self | Midgley, Eccles and Feldlaufer (1991). |
| EWQB Classroom Environment, noise and disorder | self | Midgley, Eccles and Feldlaufer (1991). |
| EWQB Classroom Environment, doing nothing | self | Midgley, Eccles and Feldlaufer (1991). |

### Supplementary Table 27: Eigenvalues and standardised factor loadings greater than +/- 0.30 for exploratory factor analysis (EFA; using oblimin rotation) of subjective school environment measures at age 9 and 16

| Eigenvalues for School Environment at age 9 | | | | | | | | | | |
| --- | --- | --- | --- | --- | --- | --- | --- | --- | --- | --- |
| [1] | 4.68 | 2.16 | 1.41 | 1.36 | 1.15 | 1.00 | 0.97 | 0.87 | 0.80 | 0.77 |
| [10] | 0.74 | 0.71 | 0.66 | 0.60 | 0.54 | 0.50 | 0.49 | 0.45 | 0.43 | 0.33 |
| [19] | 0.25 |  |  |  |  |  |  |  |  |  |
| Eigenvalues for School Environment at age 16 | | | | | | | | | | |
| [1] | 7.26 | 2.90 | 2.38 | 1.81 | 1.70 | 1.63 | 1.50 | 1.35 | 1.26 | 0.98 |
| [11] | 0.89 | 0.85 | 0.79 | 0.76 | 0.72 | 0.65 | 0.59 | 0.56 | 0.55 | 0.49 |
| [21] | 0.46 | 0.44 | 0.43 | 0.39 | 0.39 | 0.38 | 0.35 | 0.32 | 0.29 | 0.26 |
| [31] | 0.25 | 0.23 | 0.19 | 0.001 |  |  |  |  |  |  |

| Standardised factor loadings at age 9 | | | | | |
| --- | --- | --- | --- | --- | --- |
|  | MR2 | MR1 | MR4 | MR3 | MR5 |
| Friends/Peer context (parent) |  | 0.57 |  |  |  |
| Friends/Peer context (teacher) |  |  |  | 0.68 |  |
| Friends/Peer context (self) | 0.50 |  |  |  |  |
| Classroom satisfaction (parent) |  | 0.59 | -0.37 |  |  |
| Classroom satisfaction (teacher) |  |  |  | -0.63 |  |
| Classroom satisfaction (self) | 0.79 |  |  |  |  |
| Teacher (parent) |  | -0.61 |  |  |  |
| Teacher (self) | -0.58 |  |  |  |  |
| Negative affect (parent) |  |  | 0.55 |  |  |
| Negative affect (self) |  |  | 0.33 |  |  |
| Adventure (parent) |  | 0.70 |  |  |  |
| Adventure (self) | 0.77 |  |  |  |  |
| Opportunity (parent) |  | 0.68 |  |  |  |
| Opportunity (self) | -0.63 |  |  |  |  |
| Acceptance (parent) |  |  | -0.64 |  |  |
| Acceptance (self) | -0.44 |  | 0.40 |  |  |
| Homework: nights per week |  |  |  |  |  |
| Homework: usually finishes |  |  |  | 0.39 |  |
| Homework: involves others |  |  |  |  |  |

| Standardised factor loadings at age 16 | | | | | | | | | |
| --- | --- | --- | --- | --- | --- | --- | --- | --- | --- |
|  | MR1 | MR2 | MR3 | MR5 | MR4 | MR8 | MR6 | MR9 | MR7 |
| School Engagement: Teacher-Student Relations |  |  | 0.85 |  |  |  |  |  |  |
| School Engagement: Control/Relevance of School Work |  |  | 0.84 |  |  |  |  |  |  |
| School Engagement: Peer Support for Learning |  |  | 0.74 |  |  |  |  |  |  |
| PISA Homework Behaviour scale |  |  |  |  |  |  |  | 0.85 |  |
| PISA Homework Feedback scale |  |  |  | 0.92 |  |  |  |  |  |
| PISA Homework total scale |  |  |  | 0.70 |  |  |  | 0.46 |  |
| PISA Attitudes to School overall |  |  |  | 0.38 |  |  |  |  |  |
| Life Satisfaction School |  |  |  | 0.32 |  |  |  |  |  |
| Classroom environment: work in small groups |  |  |  |  |  | 0.31 |  |  |  |
| Classroom environment: help each other |  |  |  |  |  | 0.44 |  |  |  |
| Classroom environment: first to answer |  |  |  |  |  |  | 0.80 |  |  |
| Classroom environment: first to finish |  |  |  |  |  |  | 0.94 |  |  |
| Classroom environment: show each other work |  |  |  |  |  | 0.78 |  |  |  |
| Classroom environment: tell each other reports |  |  |  |  |  | 0.70 |  |  |  |
| Classroom environment: makes work interesting | 0.67 |  |  |  |  |  |  |  |  |
| Classroom environment: teacher likes work | 0.53 |  |  |  |  |  |  |  |  |
| Classroom environment: teacher explains why | 0.54 |  |  |  |  |  |  |  |  |
| Classroom environment: wait a long time |  | 0.75 |  |  |  |  |  |  |  |
| Classroom environment: shows an interest | 0.82 |  |  |  |  |  |  |  |  |
| Classroom environment item: express opinions | 0.71 |  |  |  |  |  |  |  |  |
| Classroom environment: continues teaching | 0.77 |  |  |  |  |  |  |  |  |
| Classroom environment: does a lot to help | 0.83 |  |  |  |  |  |  |  |  |
| Classroom environment: checks homework | 0.42 |  |  |  |  |  |  |  |  |
| Classroom environment: cannot work well |  | 0.67 |  |  |  |  |  |  |  |
| Classroom environment: do not listen |  | 0.81 |  |  |  |  |  |  |  |
| Classroom Environment: noise and disorder |  | 0.84 |  |  |  |  |  |  |  |
| Classroom environment: doing nothing |  | 0.62 |  |  |  |  |  |  |  |
| PISA School resources: school library |  |  |  |  |  |  |  |  |  |
| PISA School Resources: computers |  |  |  |  | 0.93 |  |  |  |  |
| PISA School Resources: internet |  |  |  |  | 0.86 |  |  |  |  |
| PISA School Resources: science labs |  |  |  |  |  |  |  |  | 0.32 |
| PISA Attitudes to Subjects: science |  |  |  |  |  |  |  |  | 0.67 |
| PISA Attitudes to Subjects: mathematics |  |  |  |  |  |  |  |  | 0.68 |
| PISA Attitudes to Subjects: English |  |  |  |  |  |  |  |  |  |

### Supplementary Table 28: Factor loadings and model fit statistics for confirmatory factor analyses (CFA) of subjective school environment measures at ages 9 and 16

| Age 9 | | |  |  |
| --- | --- | --- | --- | --- |
| Latent Variables: | | |  |  |
|  | Estimate | Std.Err | z-value | P(>|z|) |
| **Child-reported classroom environment** | |  |  |  |
| Friends/Peer context (self) | 0.54 | 0.02 | 26.75 | 0 |
| Classroom satisfaction (self) | 0.82 | 0.02 | 45.91 | 0 |
| Teacher (self) | -0.61 | 0.02 | -31.30 | 0 |
| Adventure (self) | 0.73 | 0.02 | 39.12 | 0 |
| Opportunity (self) | -0.60 | 0.02 | -30.61 | 0 |
| Acceptance (self) | -0.55 | 0.02 | -27.29 | 0 |
| **Parent-reported classroom environment** | |  |  |  |
| Friends/Peer context (parent) | 0.56 | 0.02 | 28.09 | 0 |
| Classroom satisfaction (parent) | 0.84 | 0.02 | 47.67 | 0 |
| Teacher (parent) | -0.57 | 0.02 | -28.73 | 0 |
| Adventure (parent) | 0.73 | 0.02 | 39.69 | 0 |
| Opportunity (parent) | 0.57 | 0.02 | 28.84 | 0 |
| **Feelings about school** | |  |  |  |
| Negative feeling about school (parent) | 0.50 | 0.02 | 22 | 0 |
| Negative feelings about school (child) | 0.39 | 0.02 | 16.2 | 0 |
| Acceptance (parent) | -0.7 | 0.02 | -29.27 | 0 |
| **Teacher-reported child attitude** | |  |  |  |
| Friends/Peer context (teacher) | 0.59 | 0.03 | 21.02 | 0 |
| Classroom satisfaction (teacher) | -0.75 | 0.03 | -24.33 | 0 |
| Homework: usually finishes (teacher) | 0.39 | 0.03 | 14.63 | 0 |
|  |  |  |  |  |
| Model fit: |  |  |  |  |
| AIC | 105044.44 |  |  |  |
| BIC | 105380.543 |  |  |  |
| CFI | 0.88 |  |  |  |
| TLI | 0.85 |  |  |  |
| RMSEA | 0.07 (0.06 – 0.07) |  |  |  |

| Age 16 | |  |  |  |
| --- | --- | --- | --- | --- |
| Latent Variables: | |  |  |  |
|  | Estimate | Std.Err | z-value | P(>|z|) |
| **Teacher quality** | |  |  |  |
| Teacher makes work interesting | 0.69 | 0.02 | 35.32 | 0 |
| Teacher likes the work she gives us | 0.59 | 0.02 | 28.74 | 0 |
| Teacher explains why our work is important | 0.54 | 0.02 | 26.14 | 0 |
| Teacher shows an interest in every students’ learning | 0.80 | 0.02 | 43.37 | 0 |
| Teacher gives everyone an opportunity to express opinions | 0.73 | 0.02 | 38.14 | 0 |
| Continues teaching until students understand | 0.79 | 0.02 | 42.91 | 0 |
| Teacher does a lot to help students | 0.83 | 0.02 | 46.05 | 0 |
| Teacher checks homework | 0.54 | 0.02 | 26.18 | 0 |
| **Classroom chaos** | |  |  |  |
| Teacher has to wait a long time for children to quieten | 0.65 | 0.02 | 30.49 | 0 |
| Students cannot work well | 0.75 | 0.02 | 35.88 | 0 |
| Students do not listen to teachers | 0.83 | 0.02 | 40.38 | 0 |
| **School satisfaction** | |  |  |  |
| PISA homework behaviour scale | 0.47 | 0.02 | 20.42 | 0 |
| PISA homework feedback scale | 0.52 | 0.02 | 22.68 | 0 |
| PISA attitudes to school | 0.67 | 0.02 | 30.87 | 0 |
| PISA school satisfaction | 0.76 | 0.02 | 35.90 | 0 |
| **School engagement** | |  |  |  |
| School engagement – teacher-student relations | 0.87 | 0.02 | 46.14 | 0 |
| School engagement – control/relevance | 0.83 | 0.02 | 43.41 | 0 |
| School engagement - peers | 0.71 | 0.02 | 36.14 | 0 |
| **Peer classroom relationships** | |  |  |  |
| Work in small groups | 0.34 | 0.03 | 13.97 | 0 |
| Help each other | 0.47 | 0.02 | 19.75 | 0 |
| See how each other work | 0.79 | 0.02 | 35.86 | 0 |
| Tell each other reports | 0.72 | 0.02 | 33.50 | 0 |
| **STEM Resources and attitudes** | |  |  |  |
| School resources: science labs | 0.44 | 0.03 | 14.13 | 0 |
| Science teaching attitudes | 0.6 | 0.03 | 22.80 | 0 |
| Maths teaching attitudes | 0.36 | 0.02 | 20.29 | 0 |
|  |  |  |  |  |
| Model fit: |  |  |  |  |
| AIC | 135590.26 |  |  |  |
| BIC | 136107.70 |  |  |  |
| CFI | 0.92 |  |  |  |
| TLI | 0.91 |  |  |  |
| RMSEA | 0.05 (0.046 – 0.051) |  |  |  |
